# Supplementary material for: A concise total synthesis of (±)-acutifolone A
Source: Royal Society of Chemistry journal article supplement (doi:10.1039/b905910e), 2009-01-01

## Supporting Information

### A Concise Total Synthesis of (±)-Acutifolone A

Ming-Tsang Hsieh, Hsing-Jang Liu,\* Tai Wei Ly and Kak-Shan Shia\*

*E-mail:* [ksshia@nhri.org.tw](mailto:ksshia@nhri.org.tw)

#### Contents

**<sup>1</sup>H & <sup>13</sup>C Spectrums for All Novel Compounds-----S2-S23**

**X-ray Crystallographic Analysis of Compound 5a-----S24**

# <sup>1</sup>H & <sup>13</sup>C Spectrums

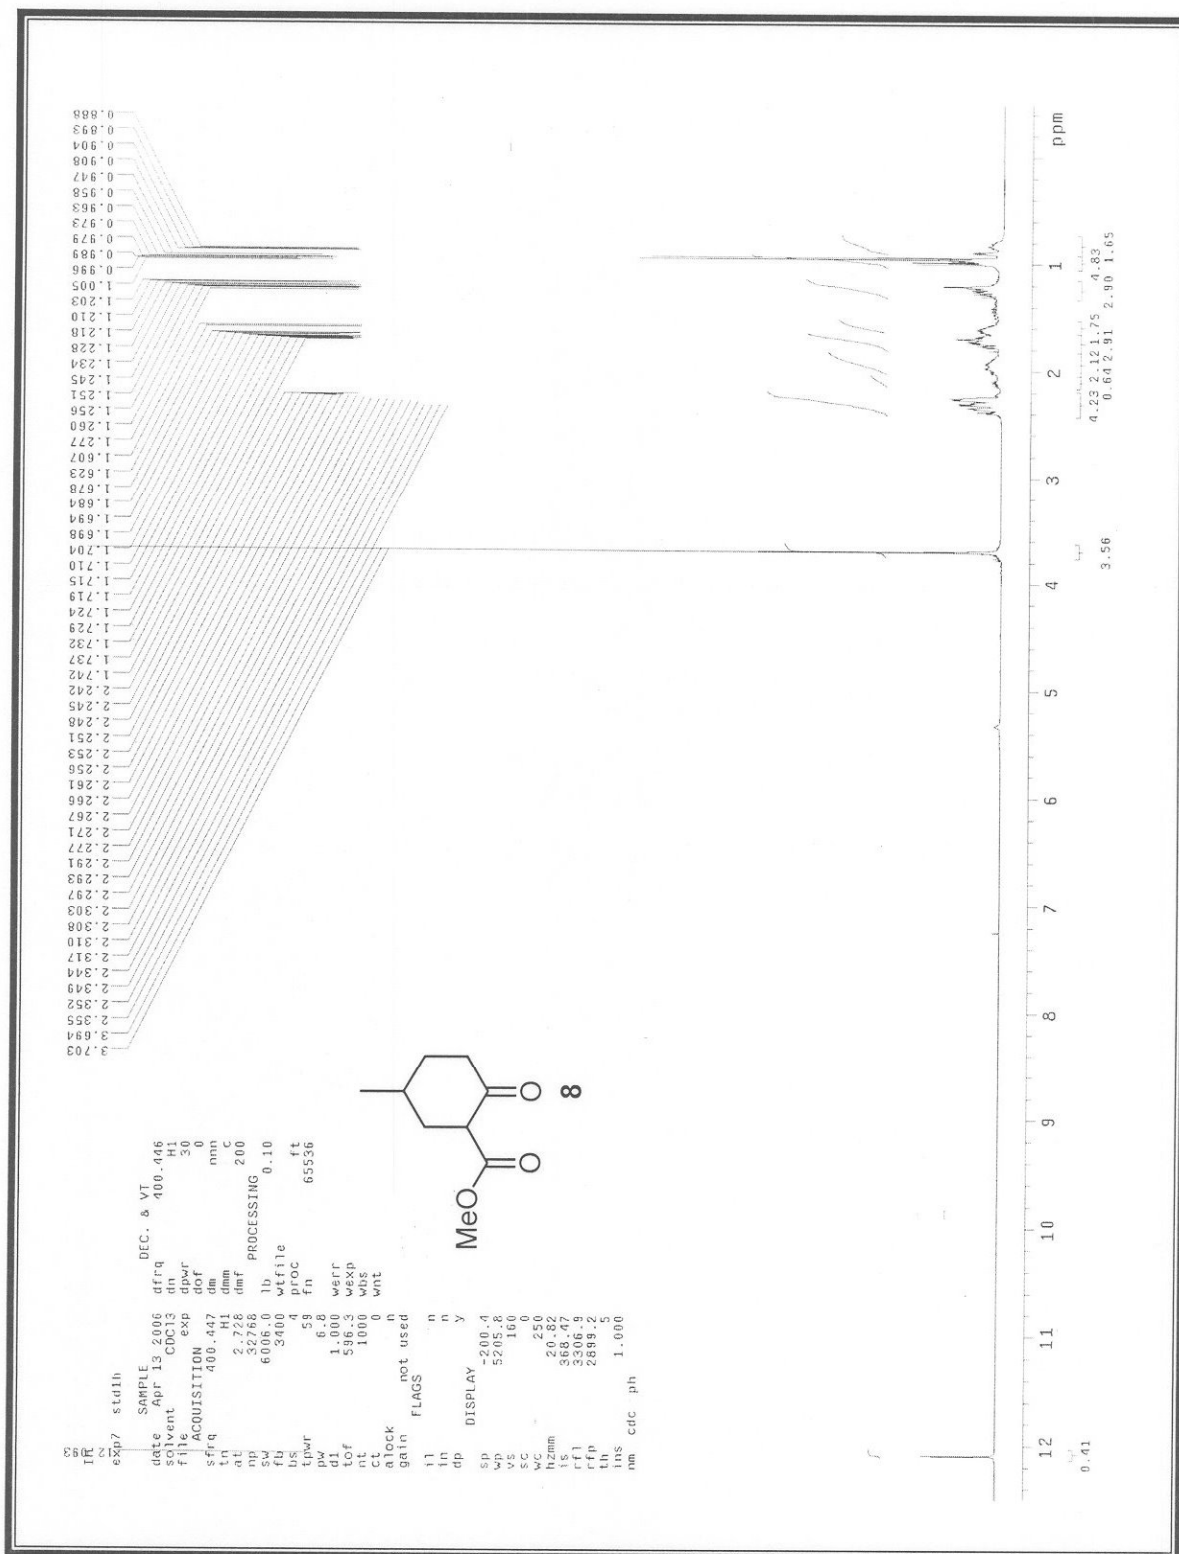

<sup>1</sup>H NMR of Compound 8

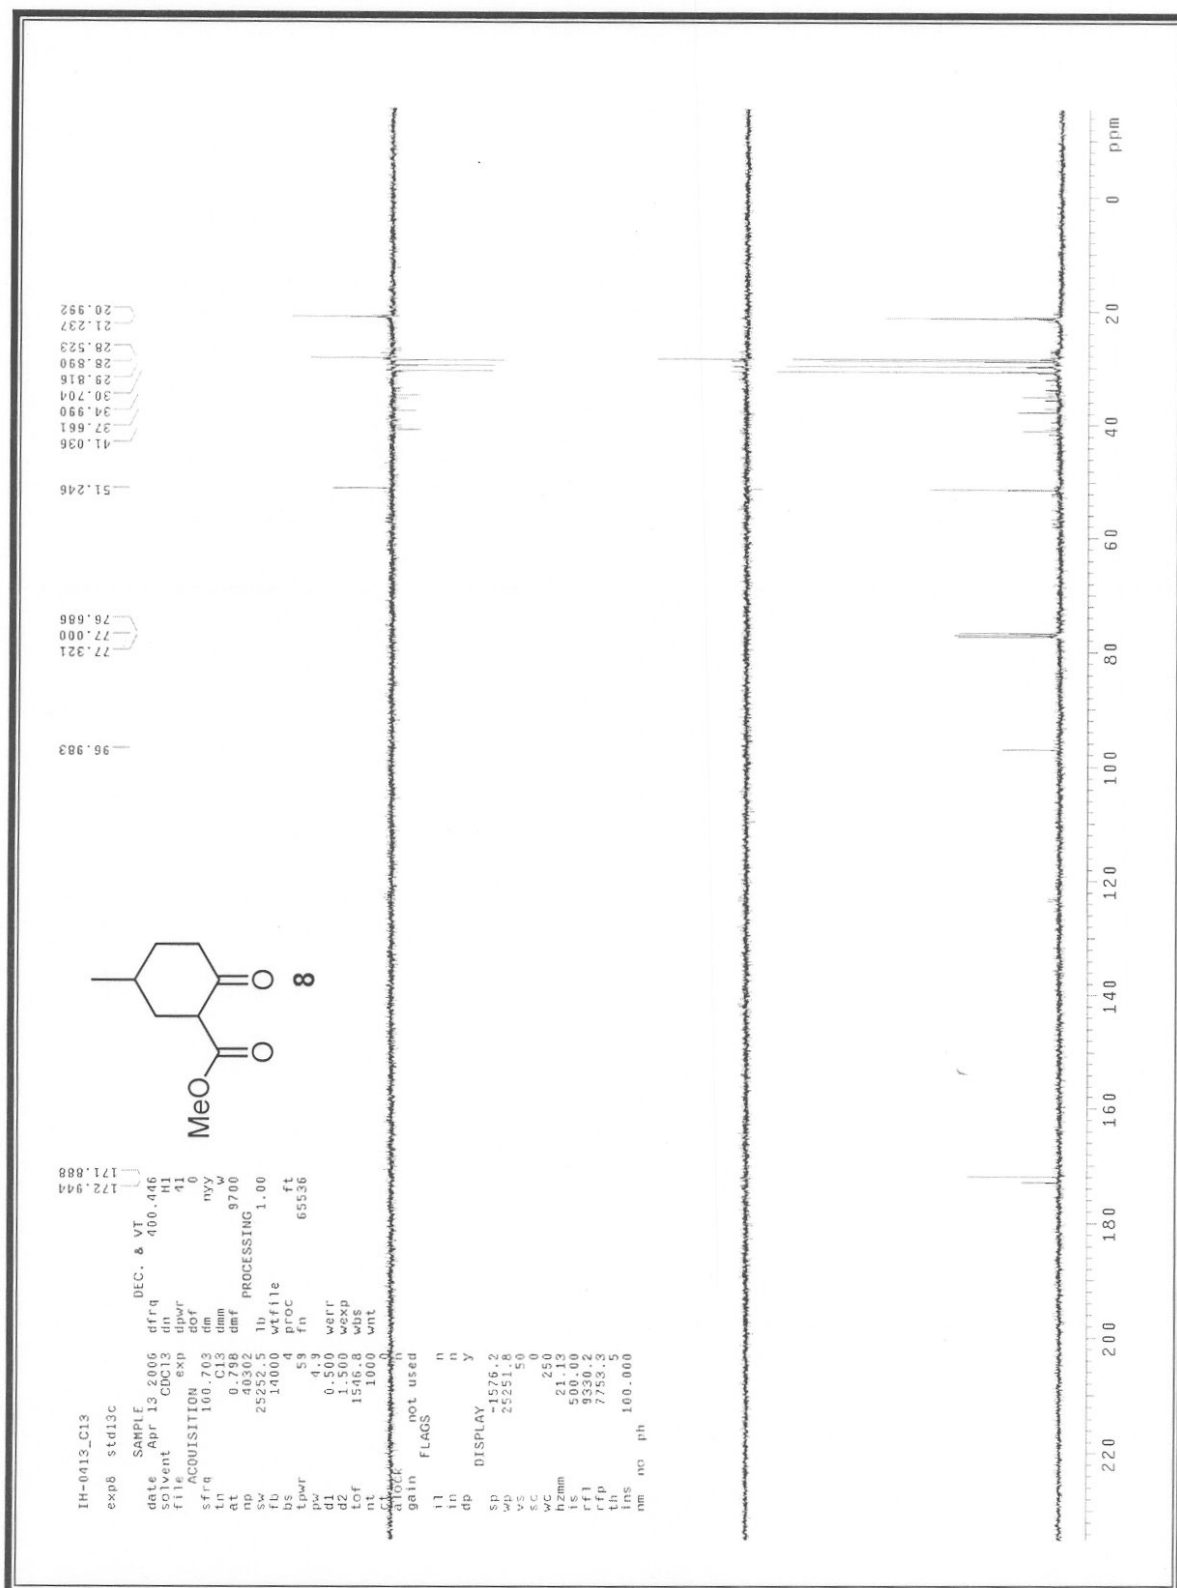

<sup>13</sup>C NMR of Compound **8**

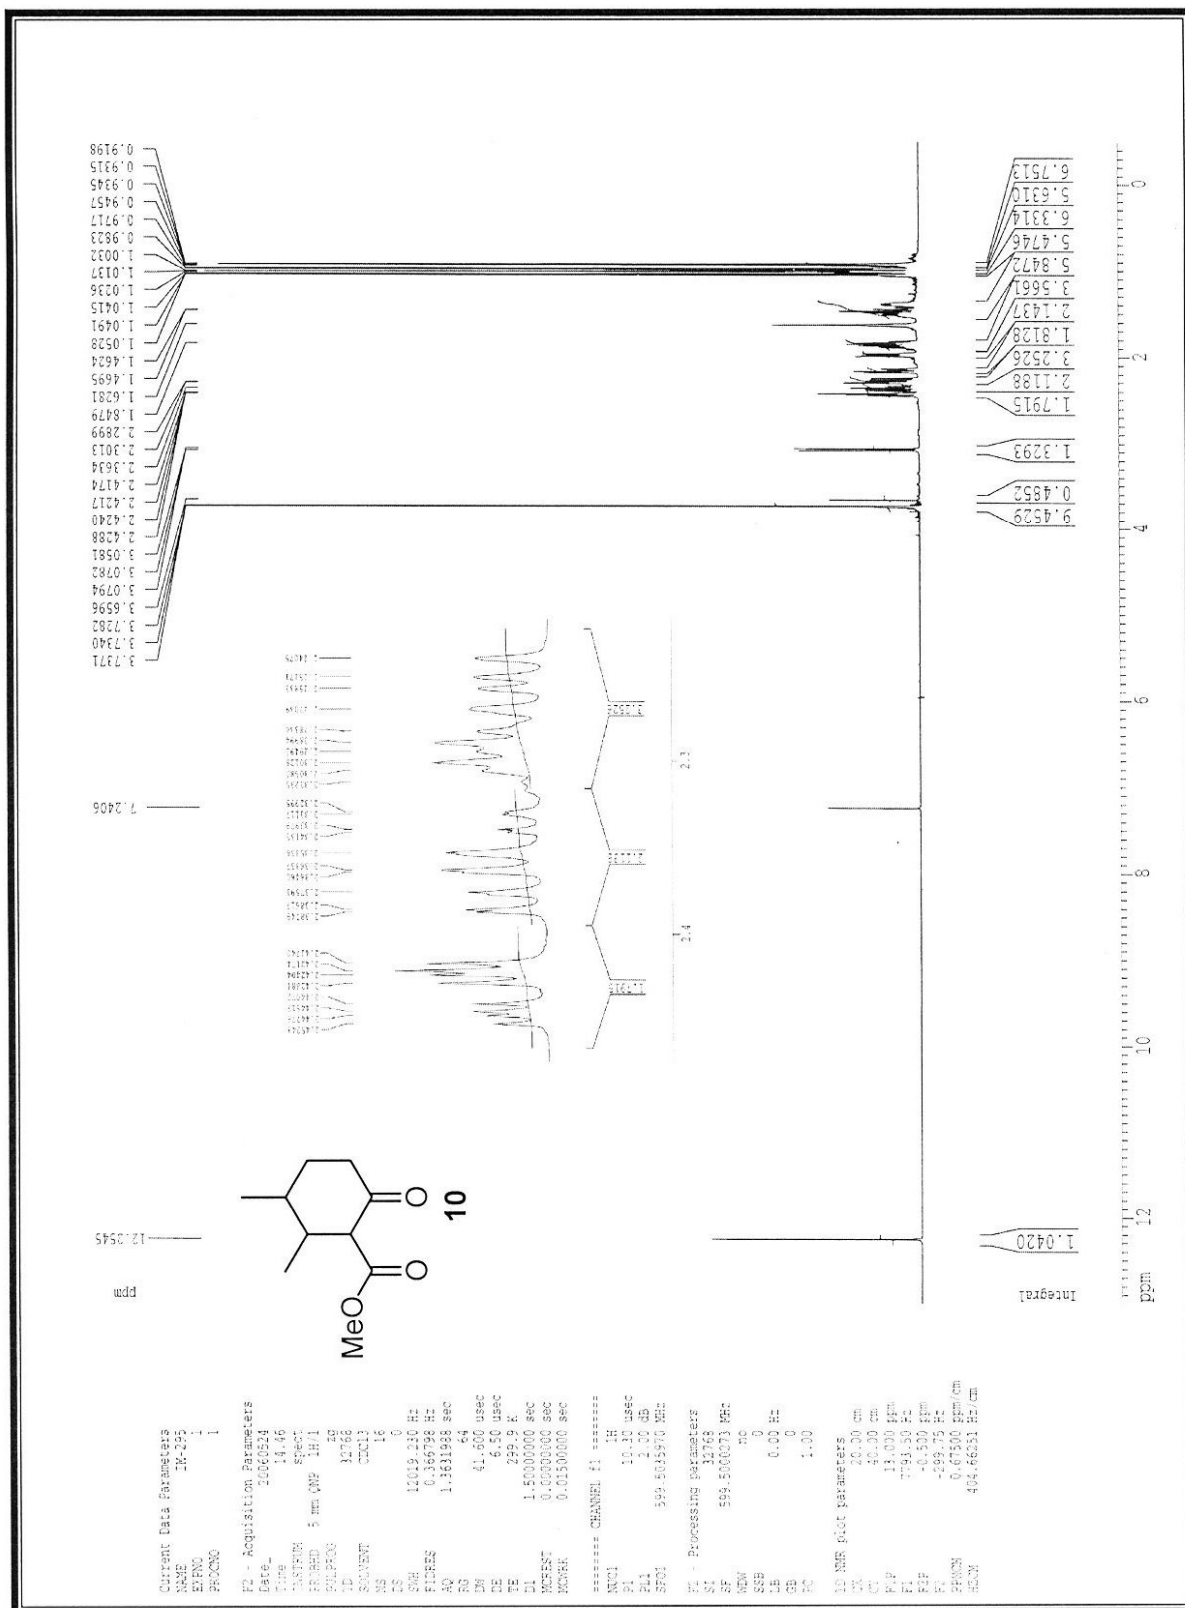

<sup>1</sup>H NMR of Compound 10

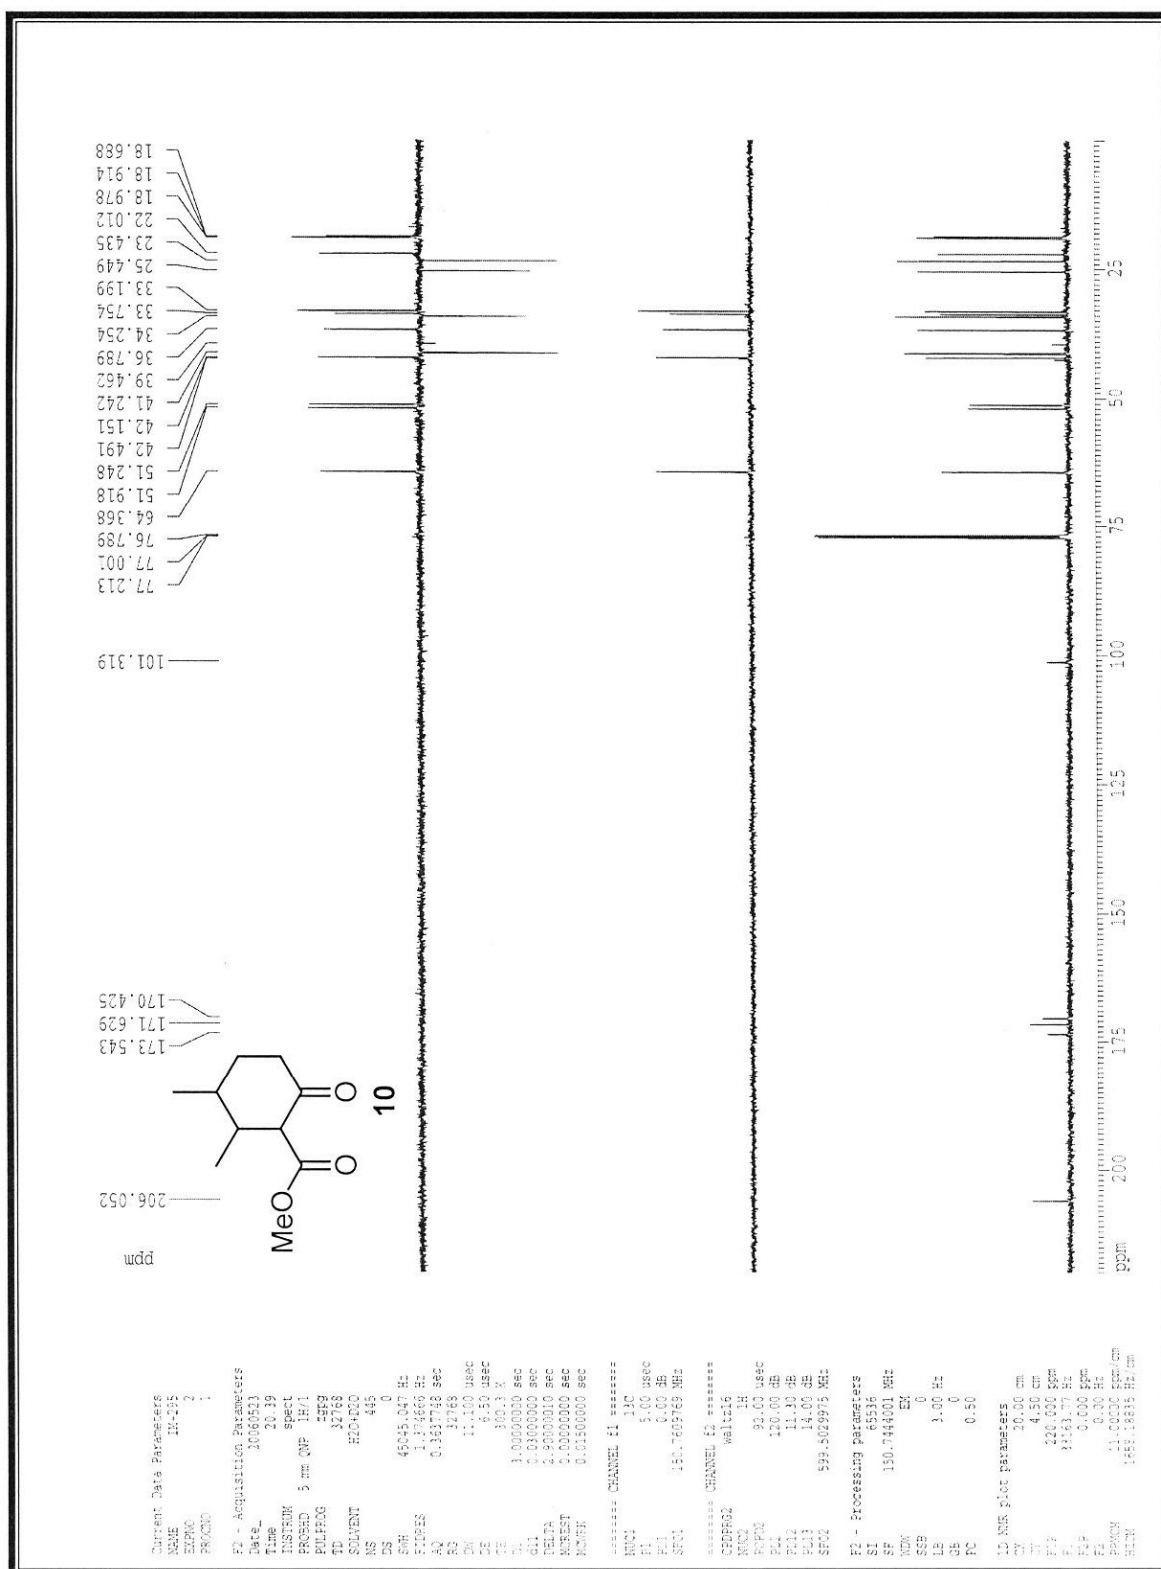

<sup>13</sup>C NMR of Compound 10

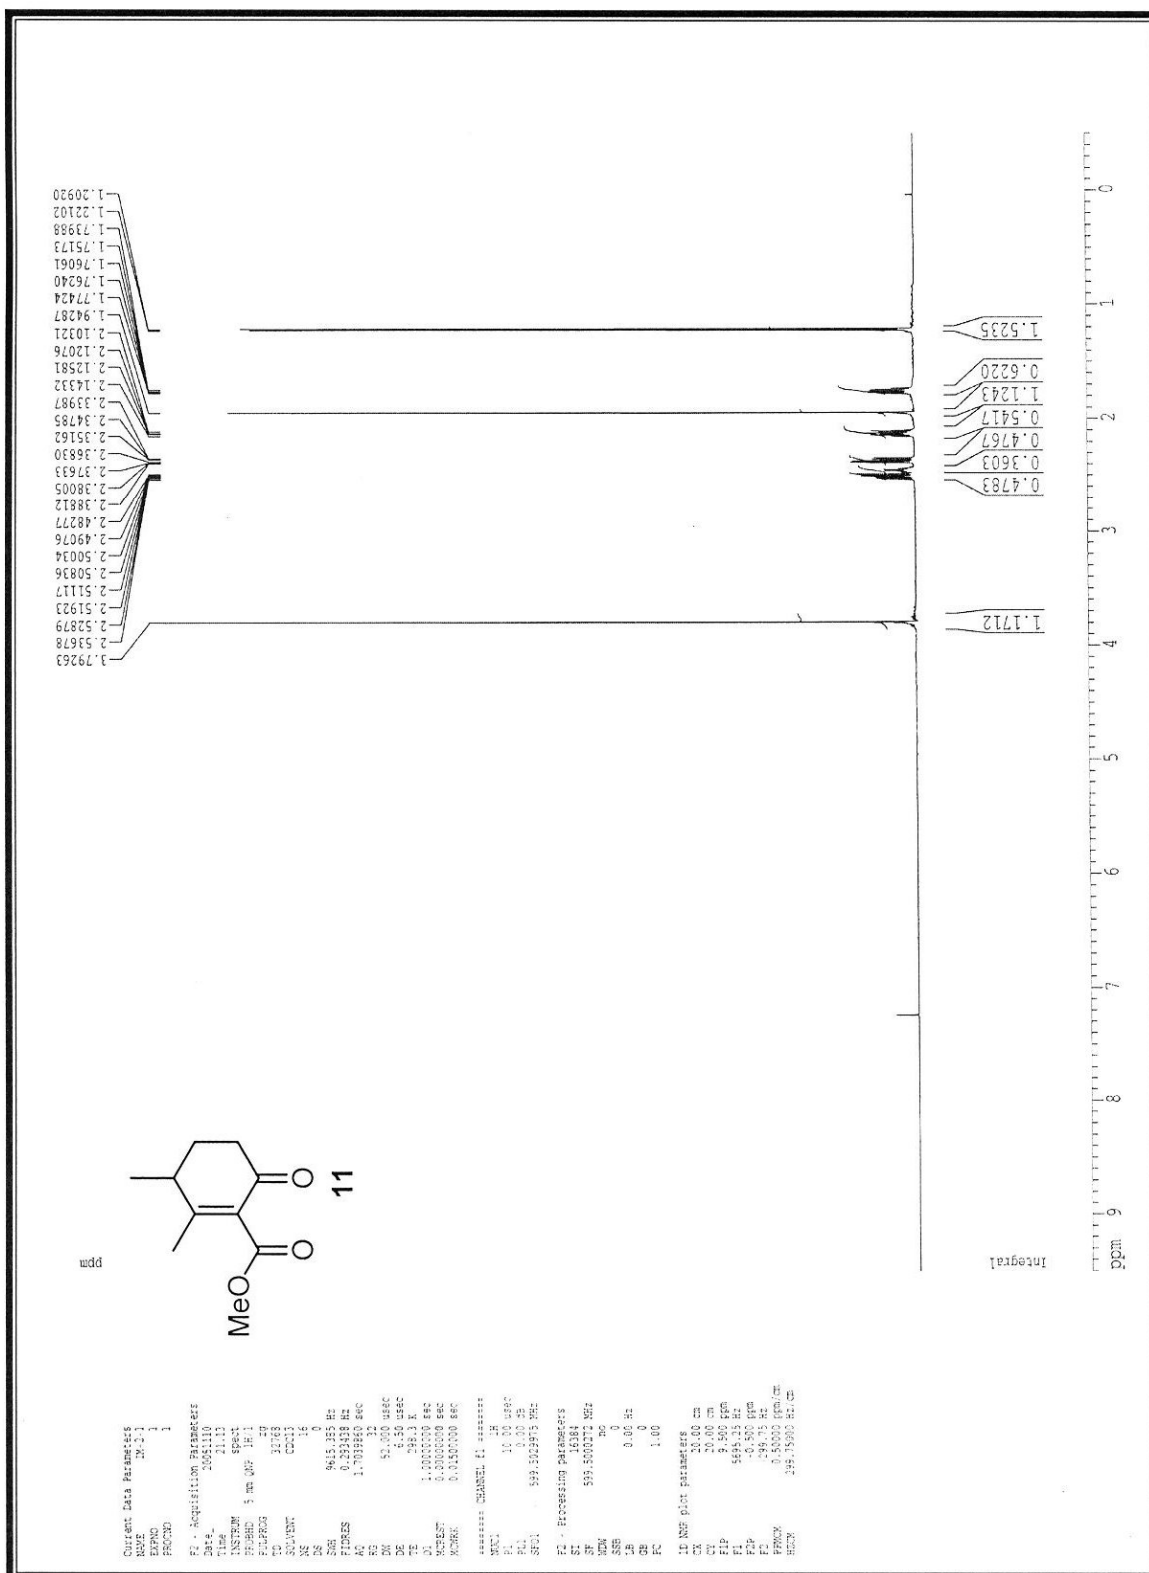

<sup>1</sup>H NMR of Compound 11

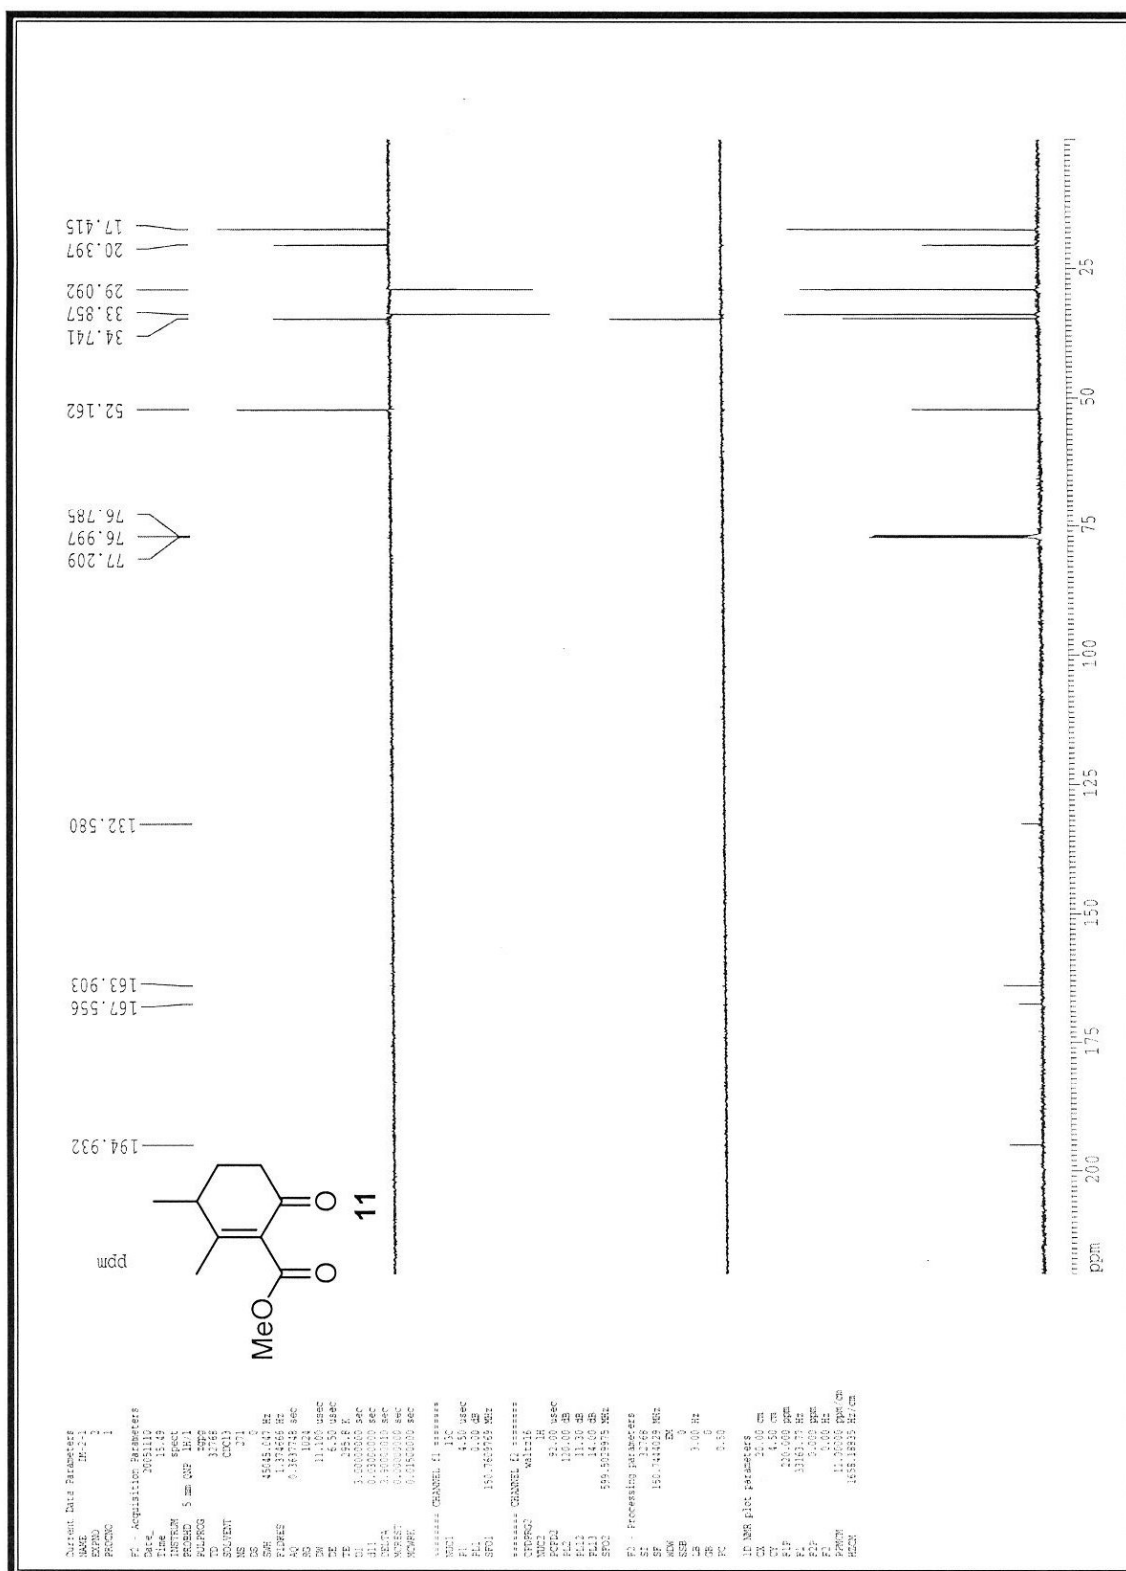

<sup>13</sup>C NMR of Compound **11**

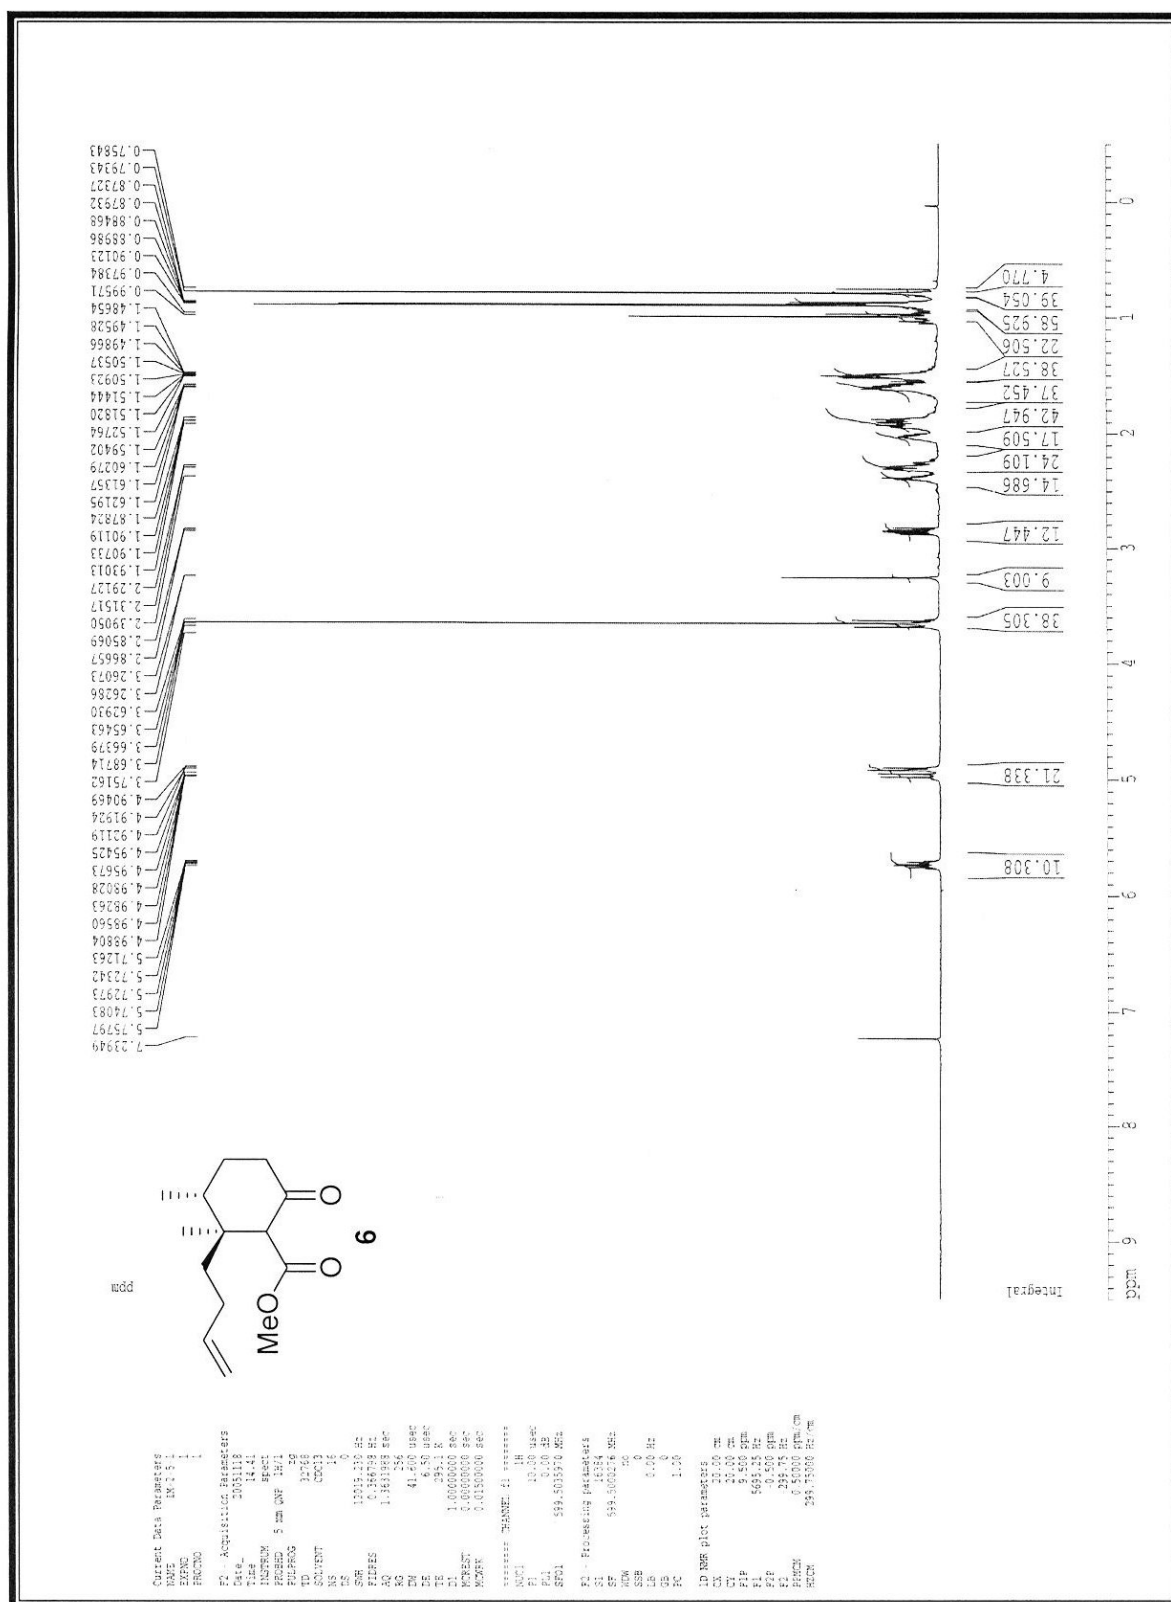

<sup>1</sup>H NMR of Compound 6



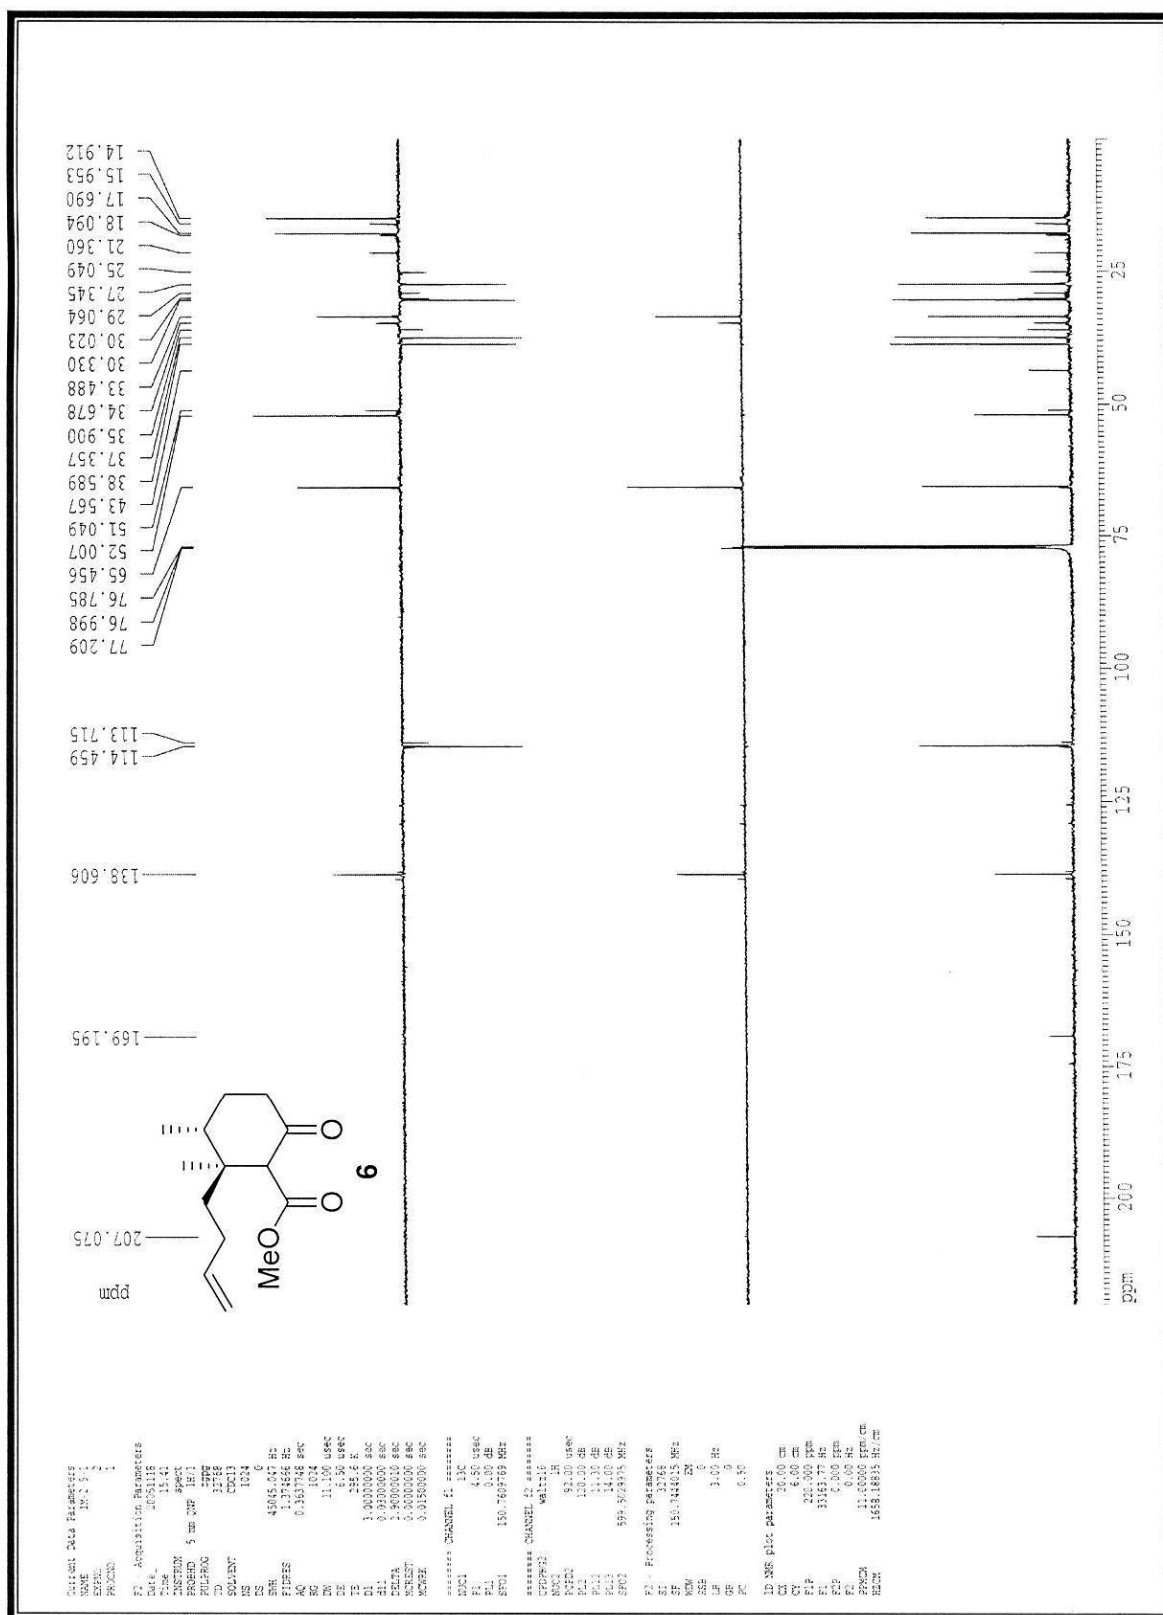

<sup>13</sup>C NMR of Compound 6

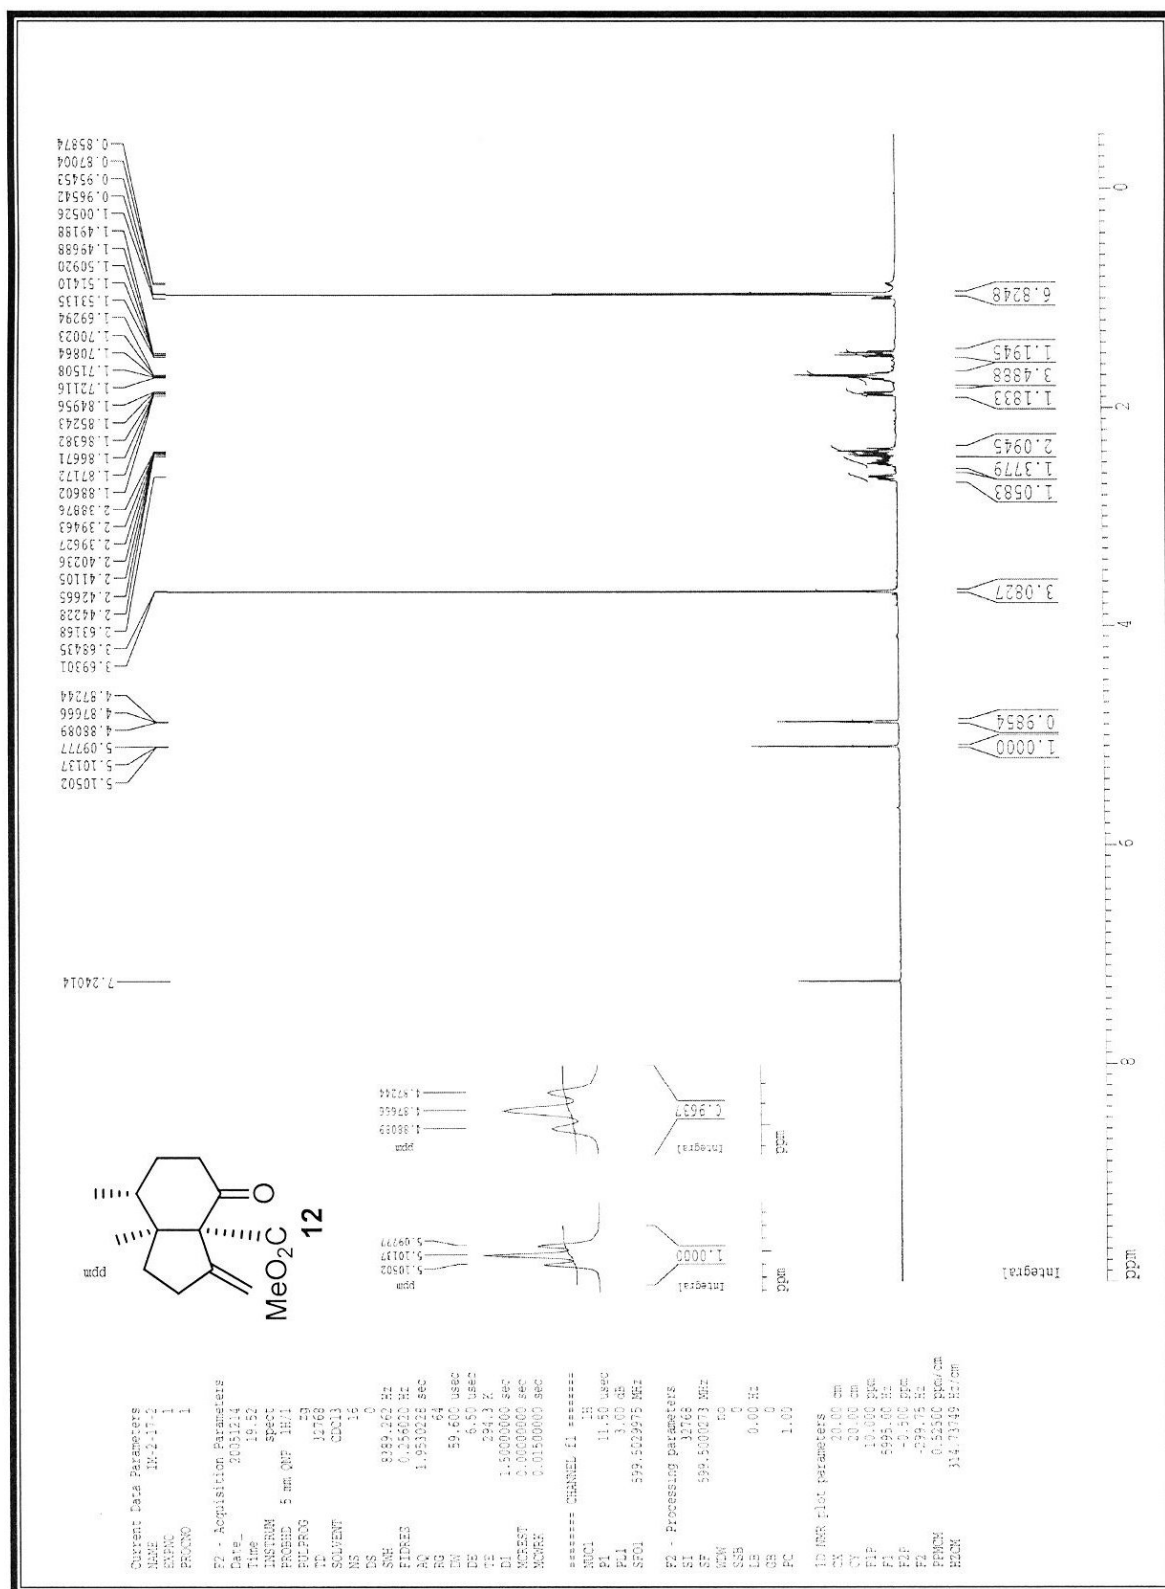

<sup>1</sup>H NMR of Compound 12



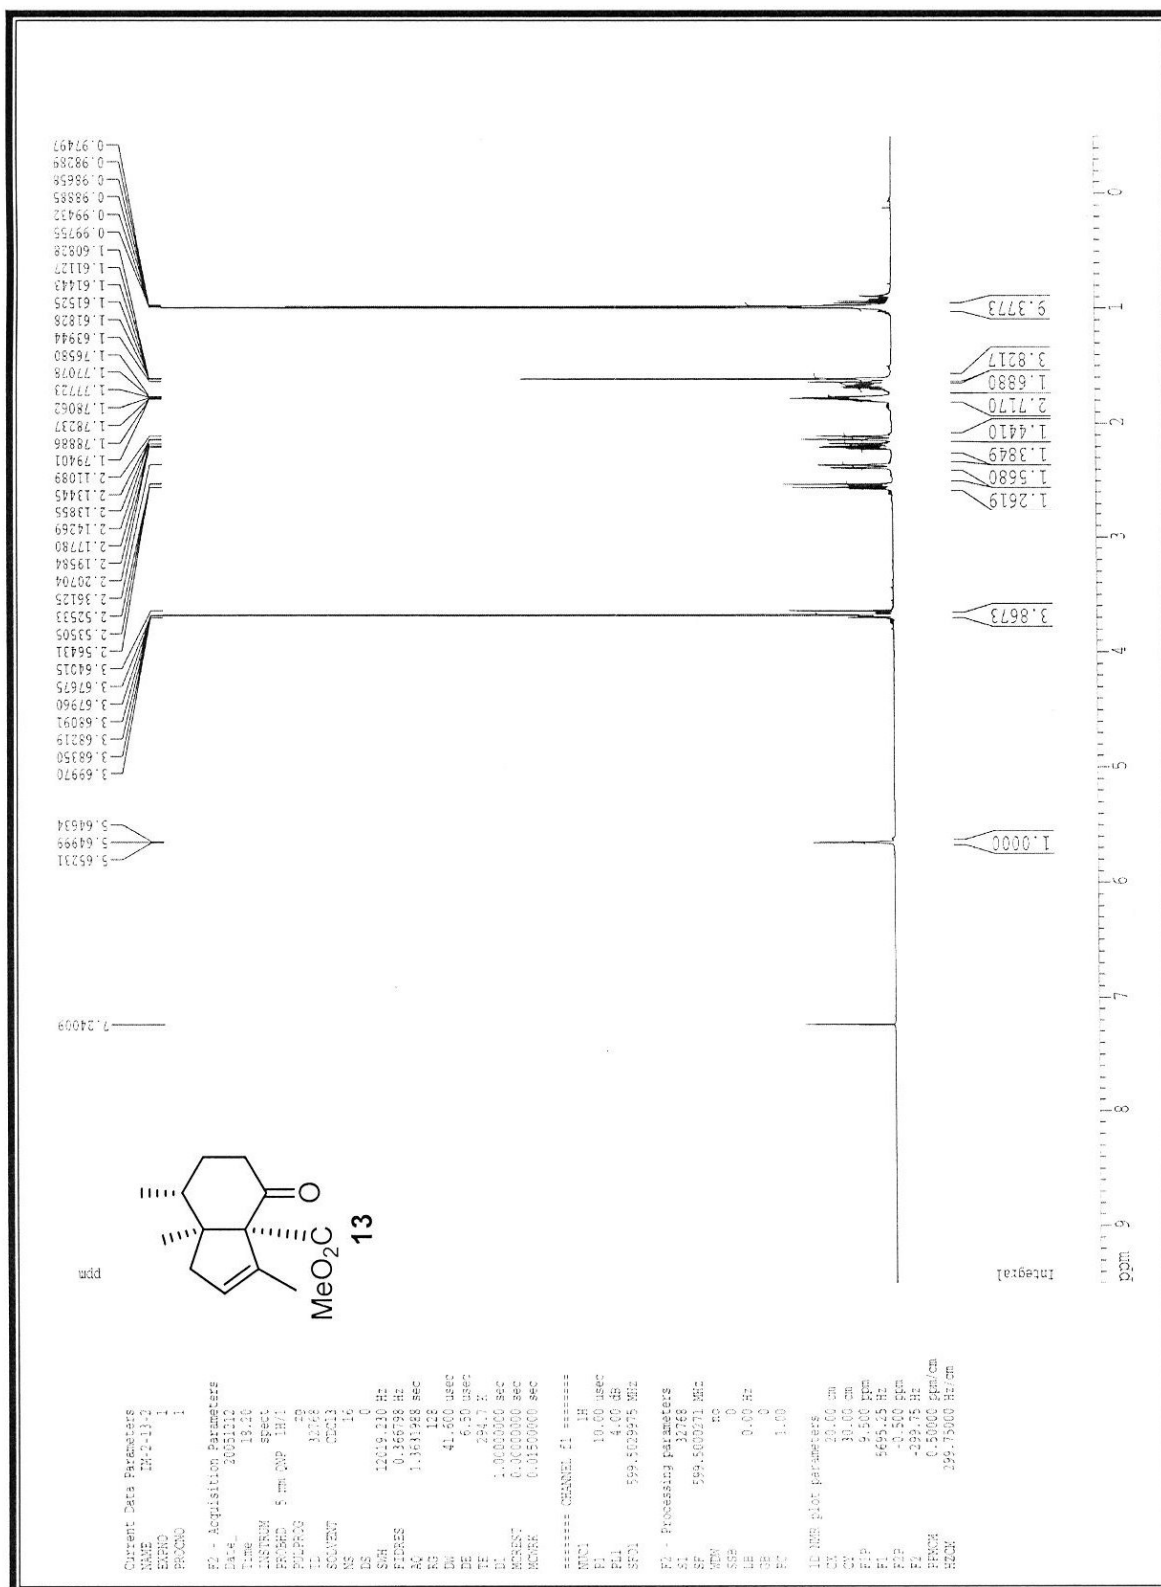

<sup>1</sup>H NMR of Compound 13



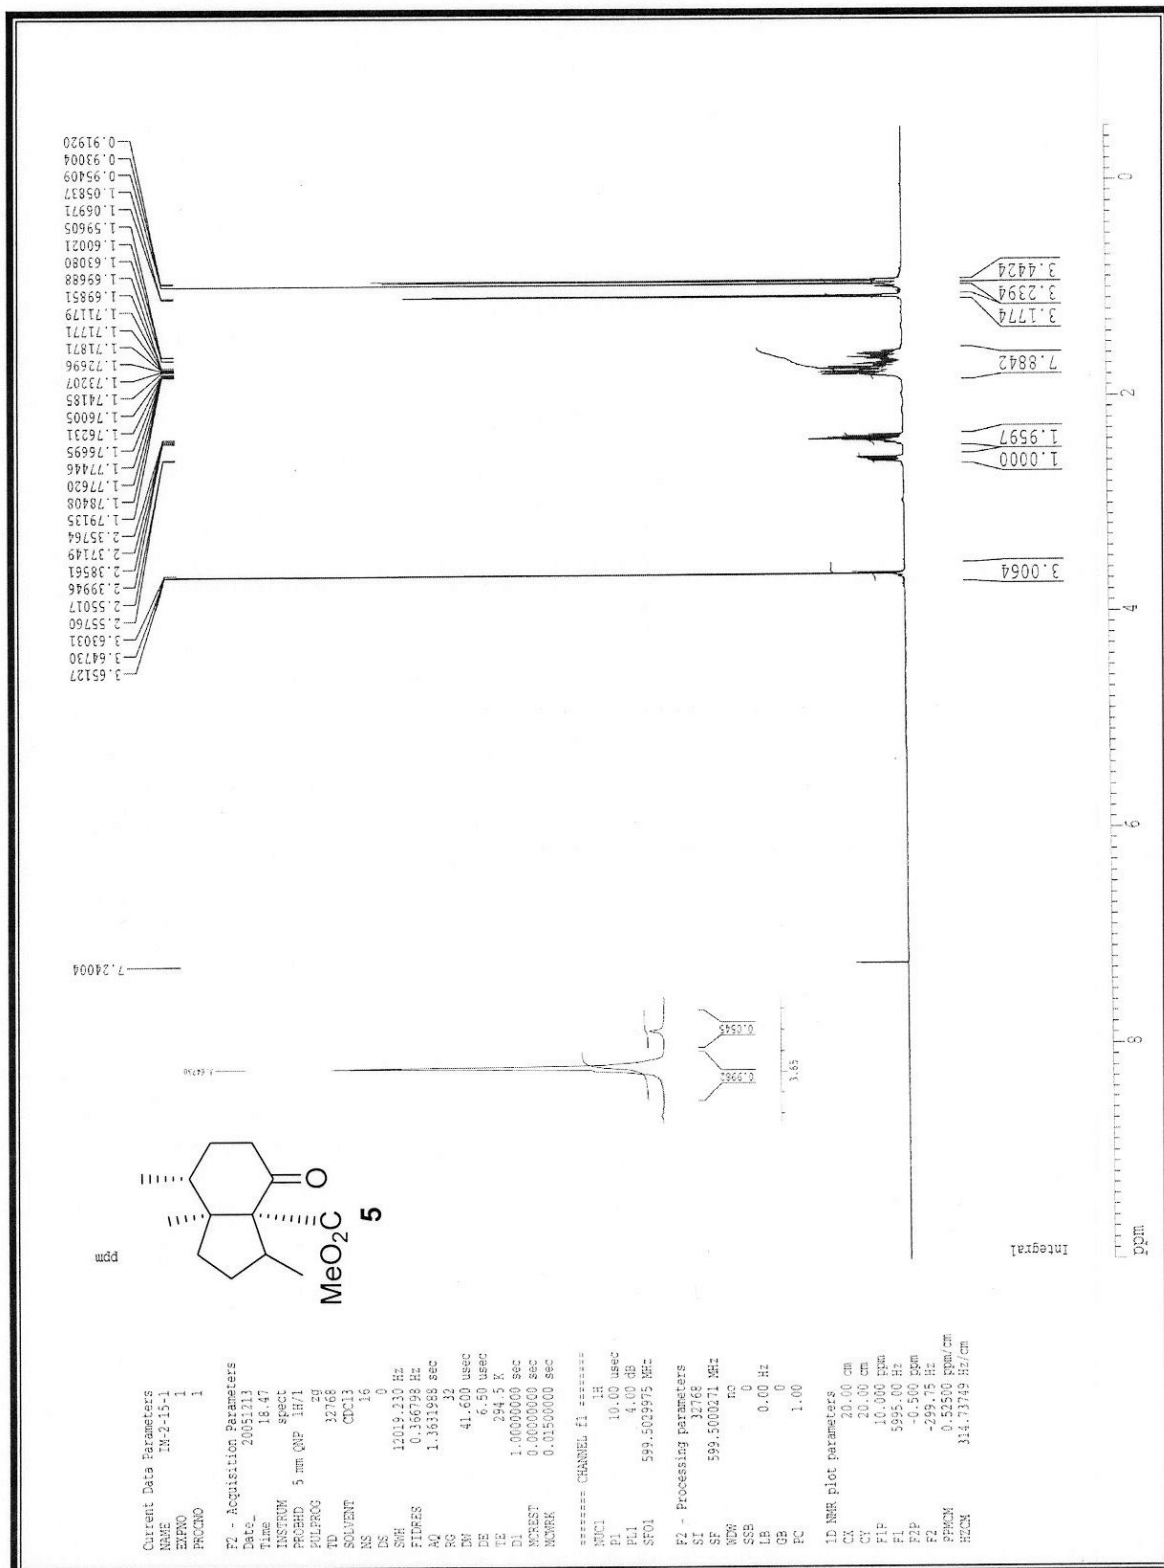

<sup>1</sup>H NMR of Compound 5

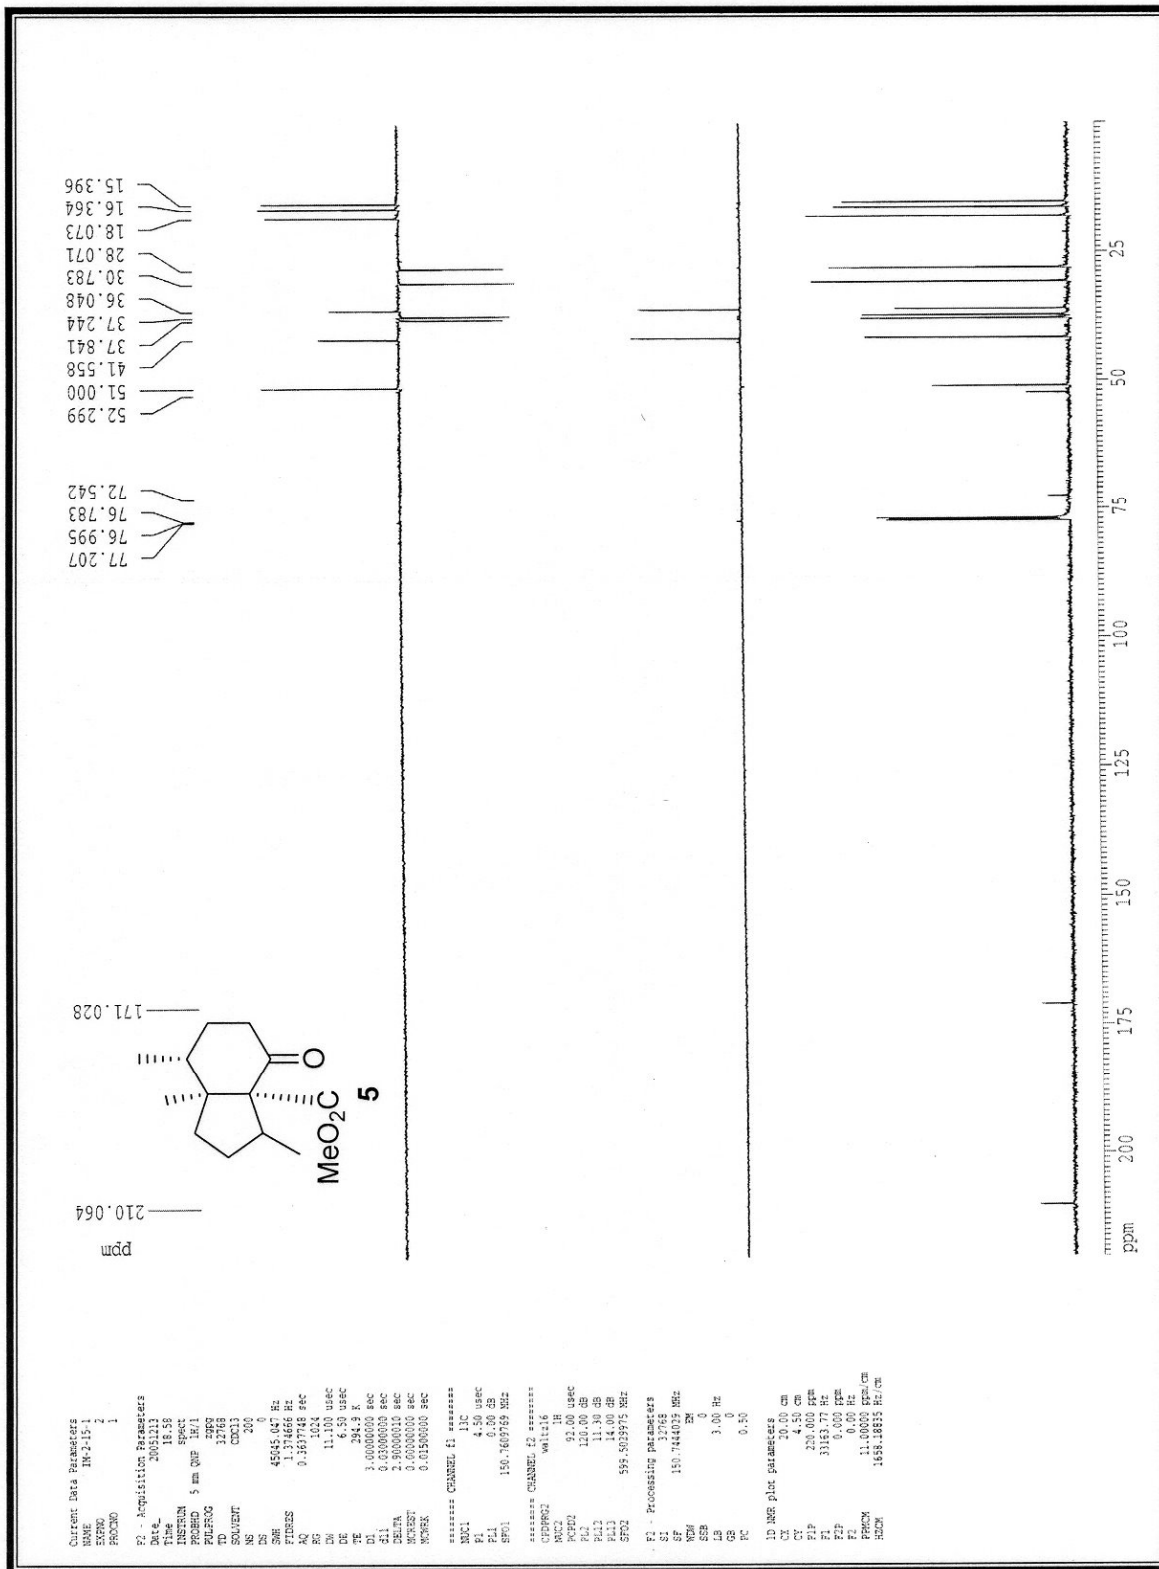

<sup>13</sup>C NMR of Compound 5

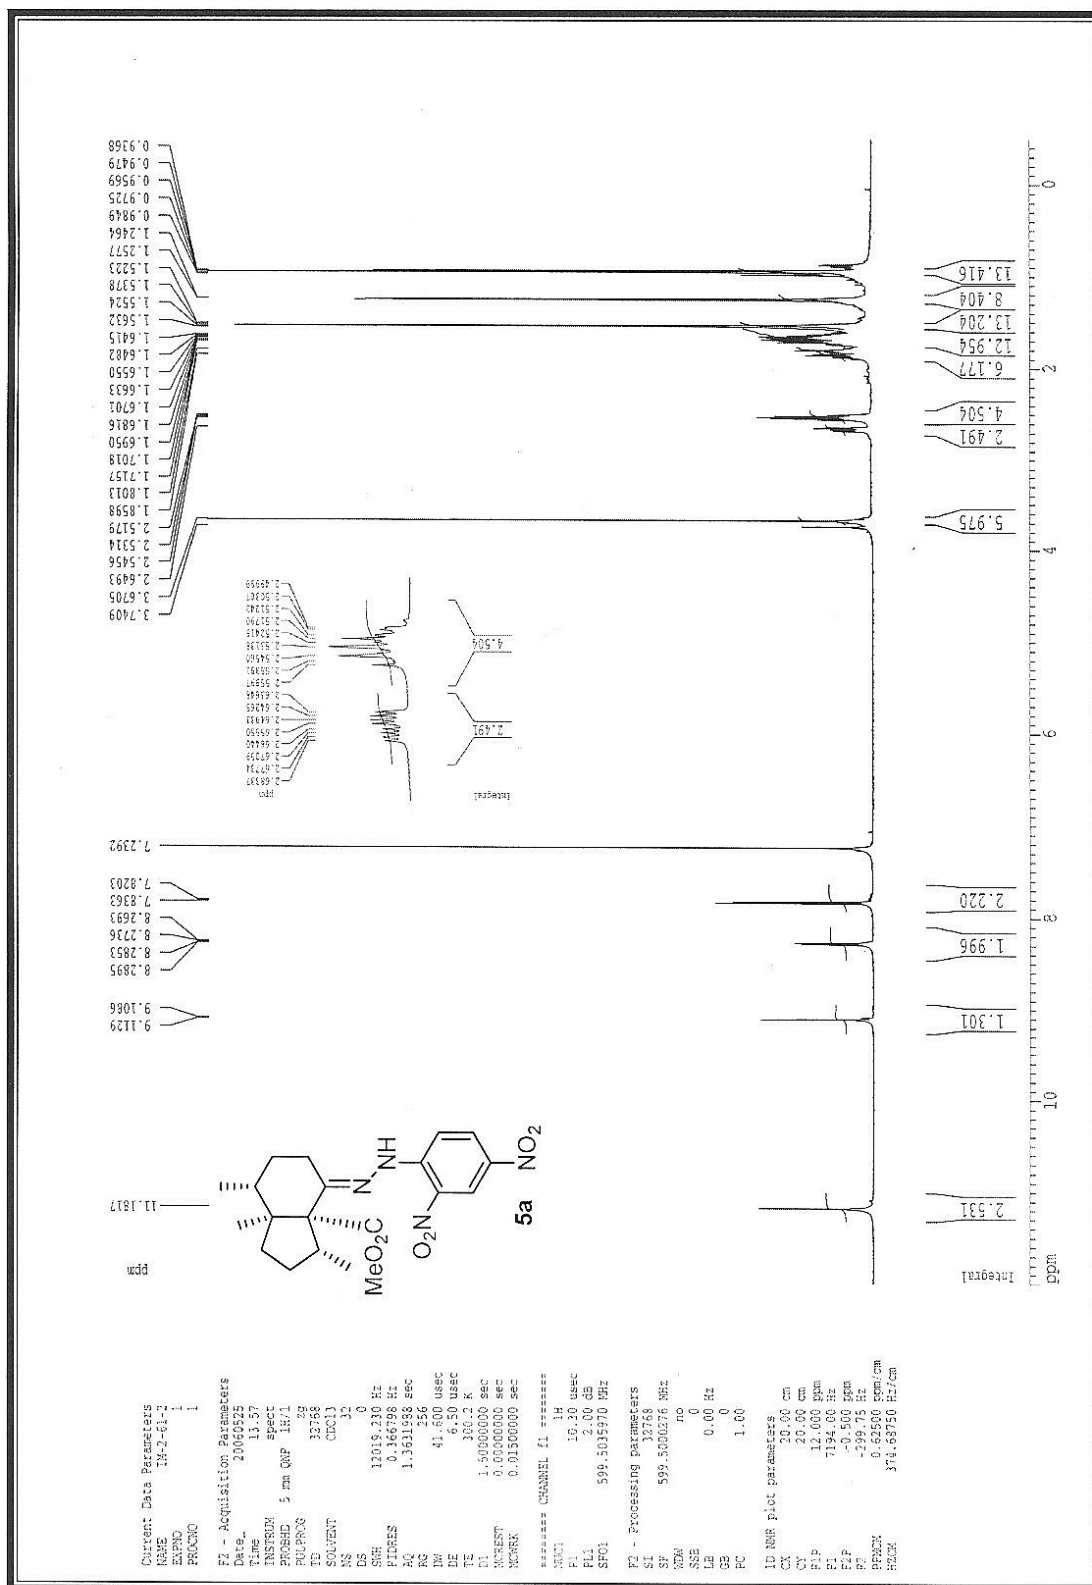

<sup>1</sup>H NMR of compound 5a



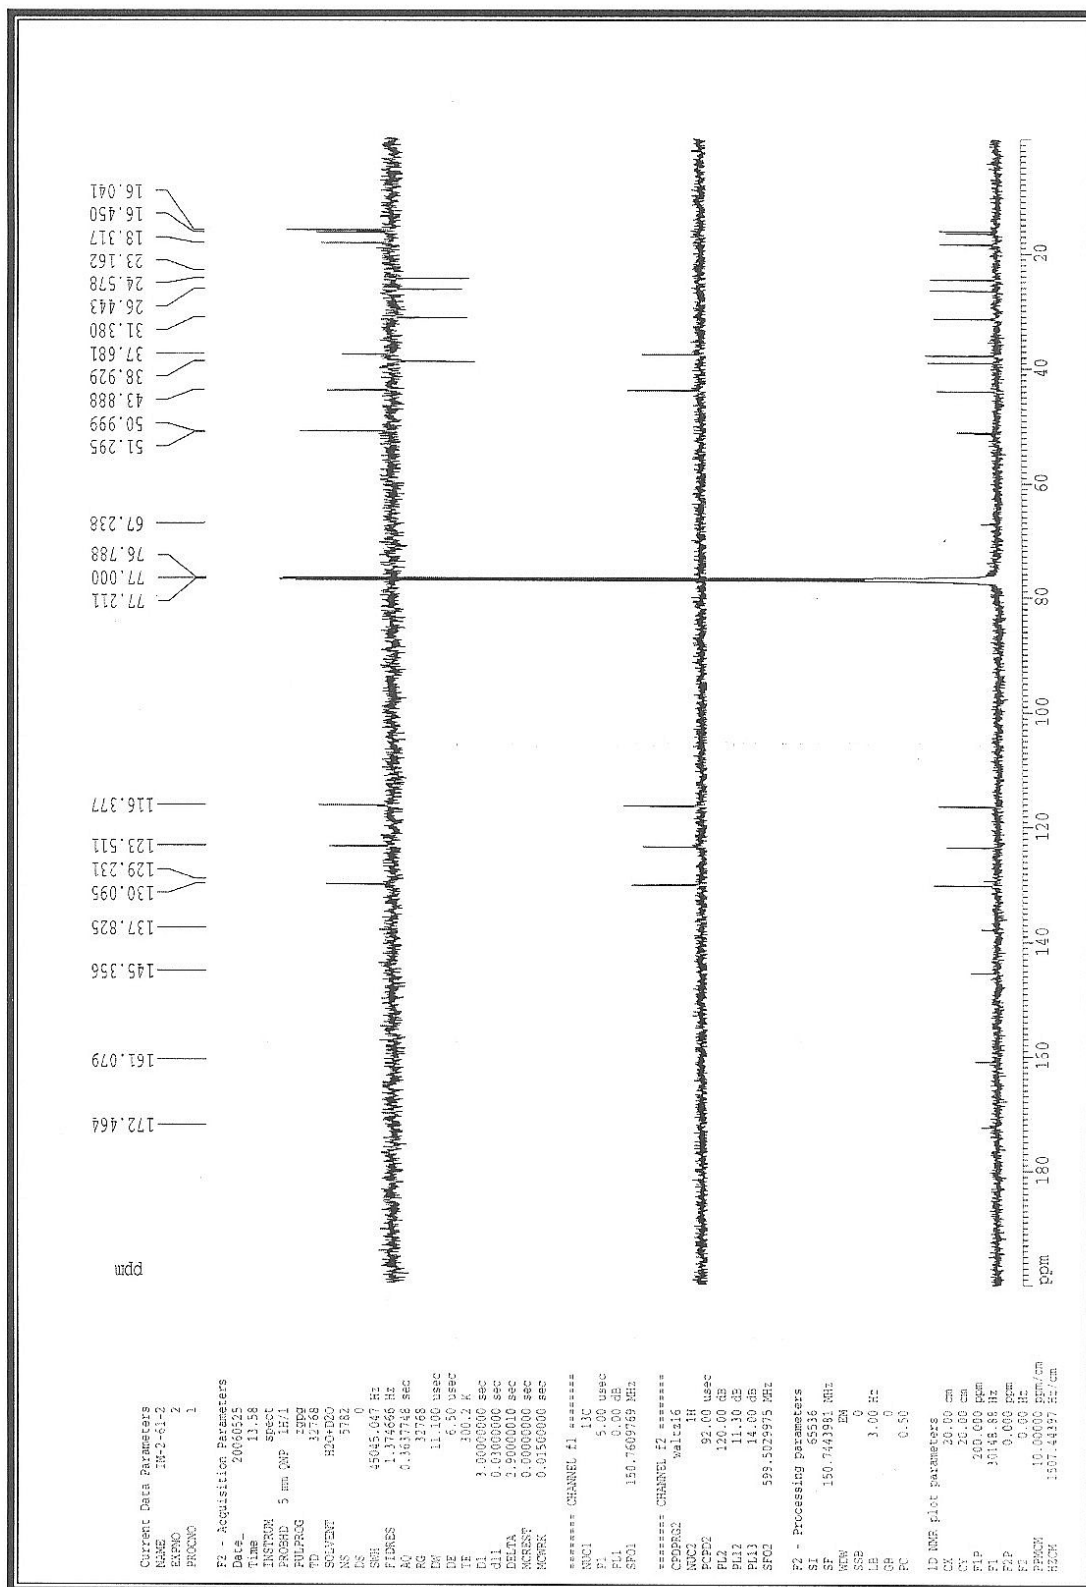

<sup>13</sup>C NMR of compound 5a

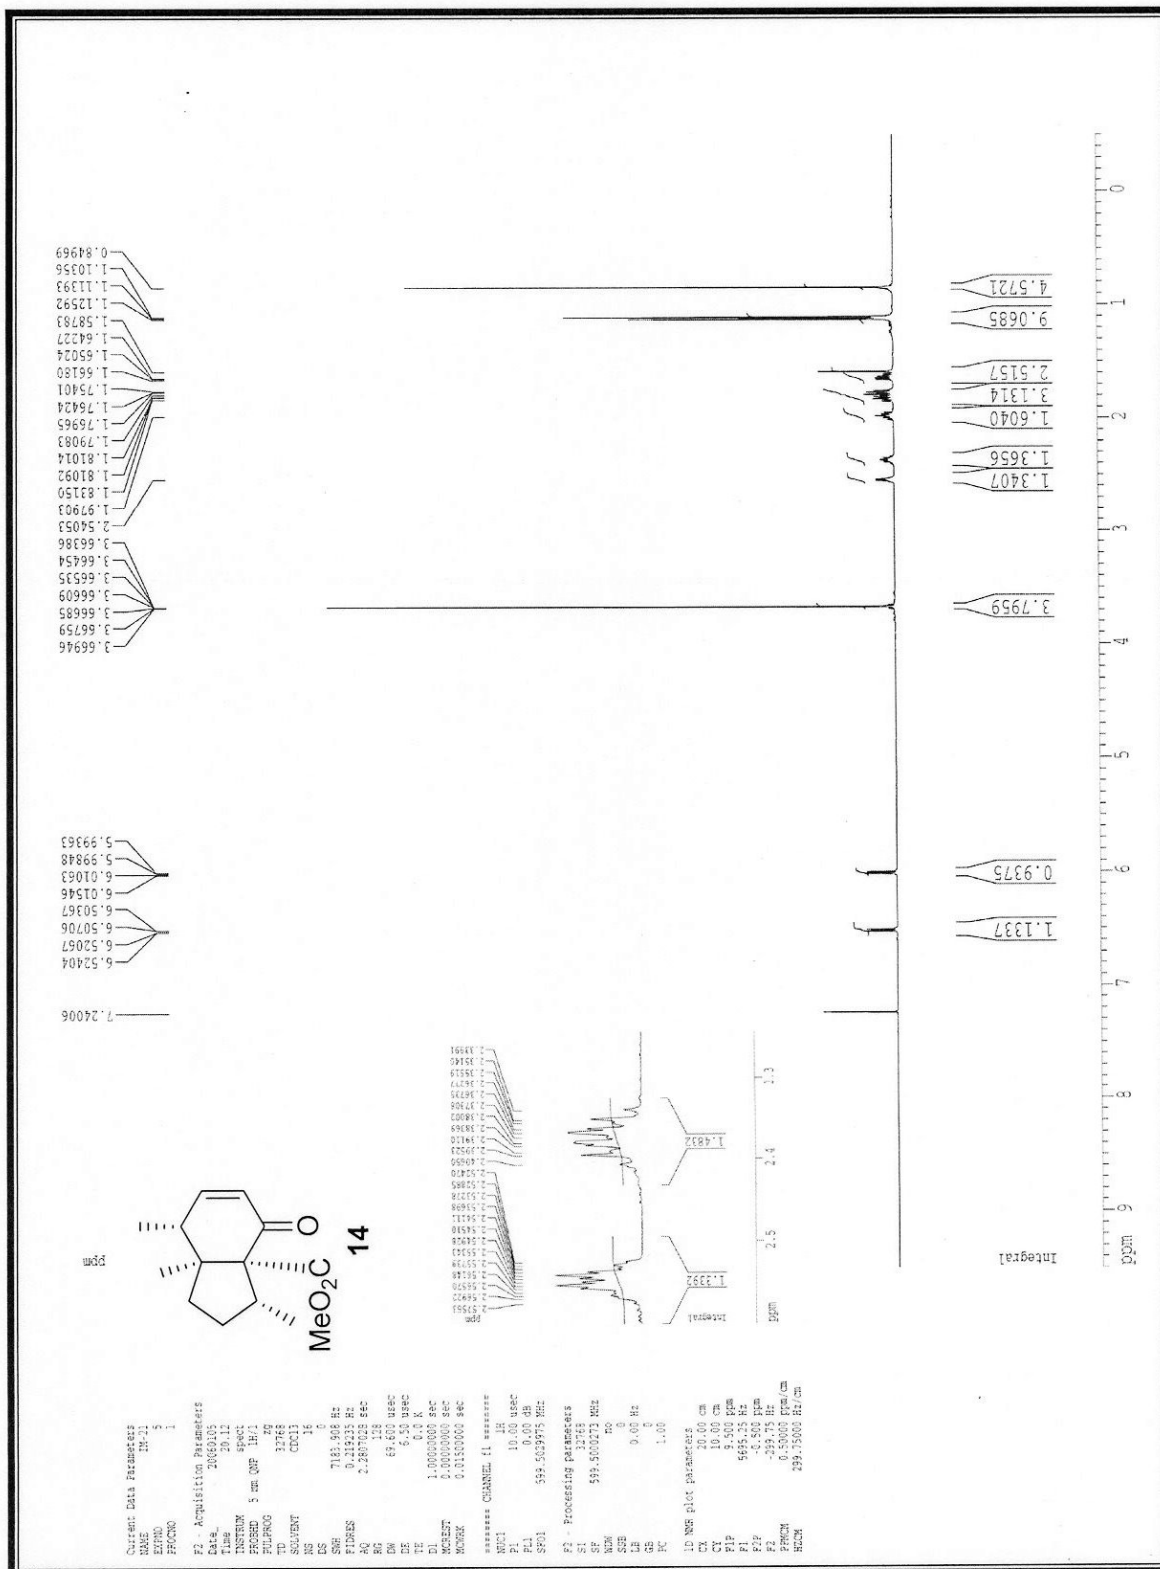

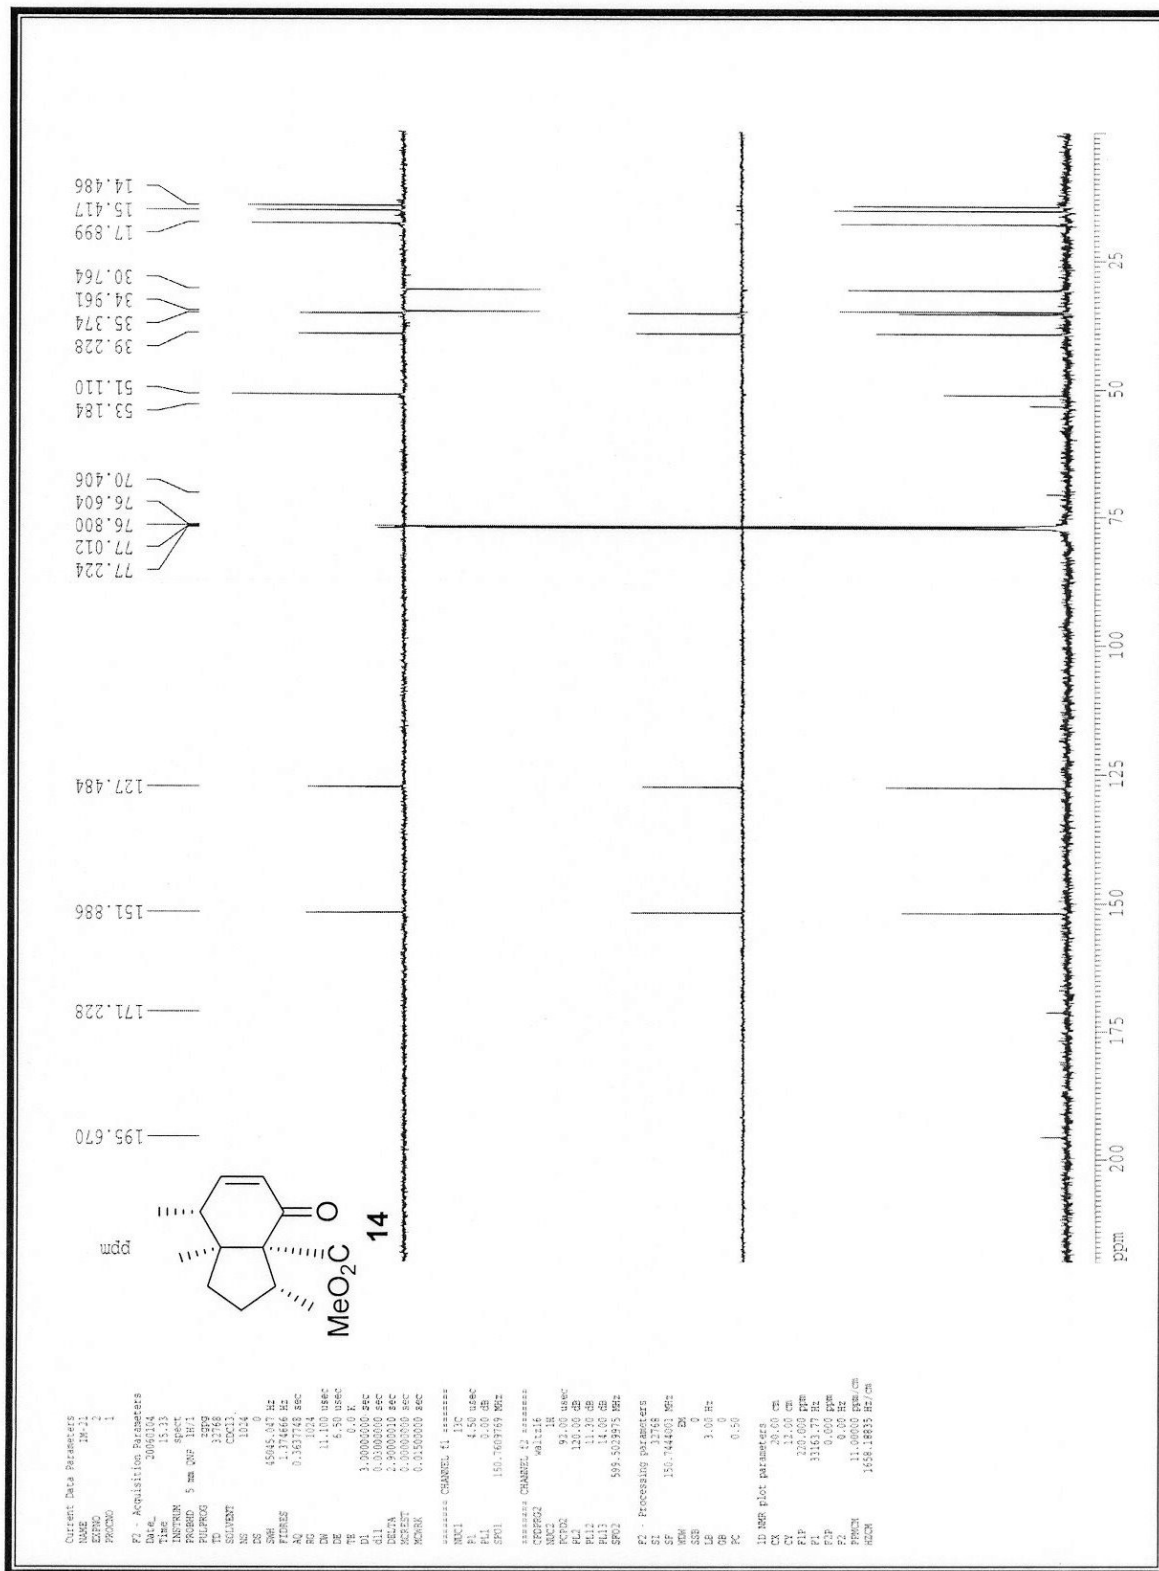

<sup>13</sup>C NMR of Compound 14

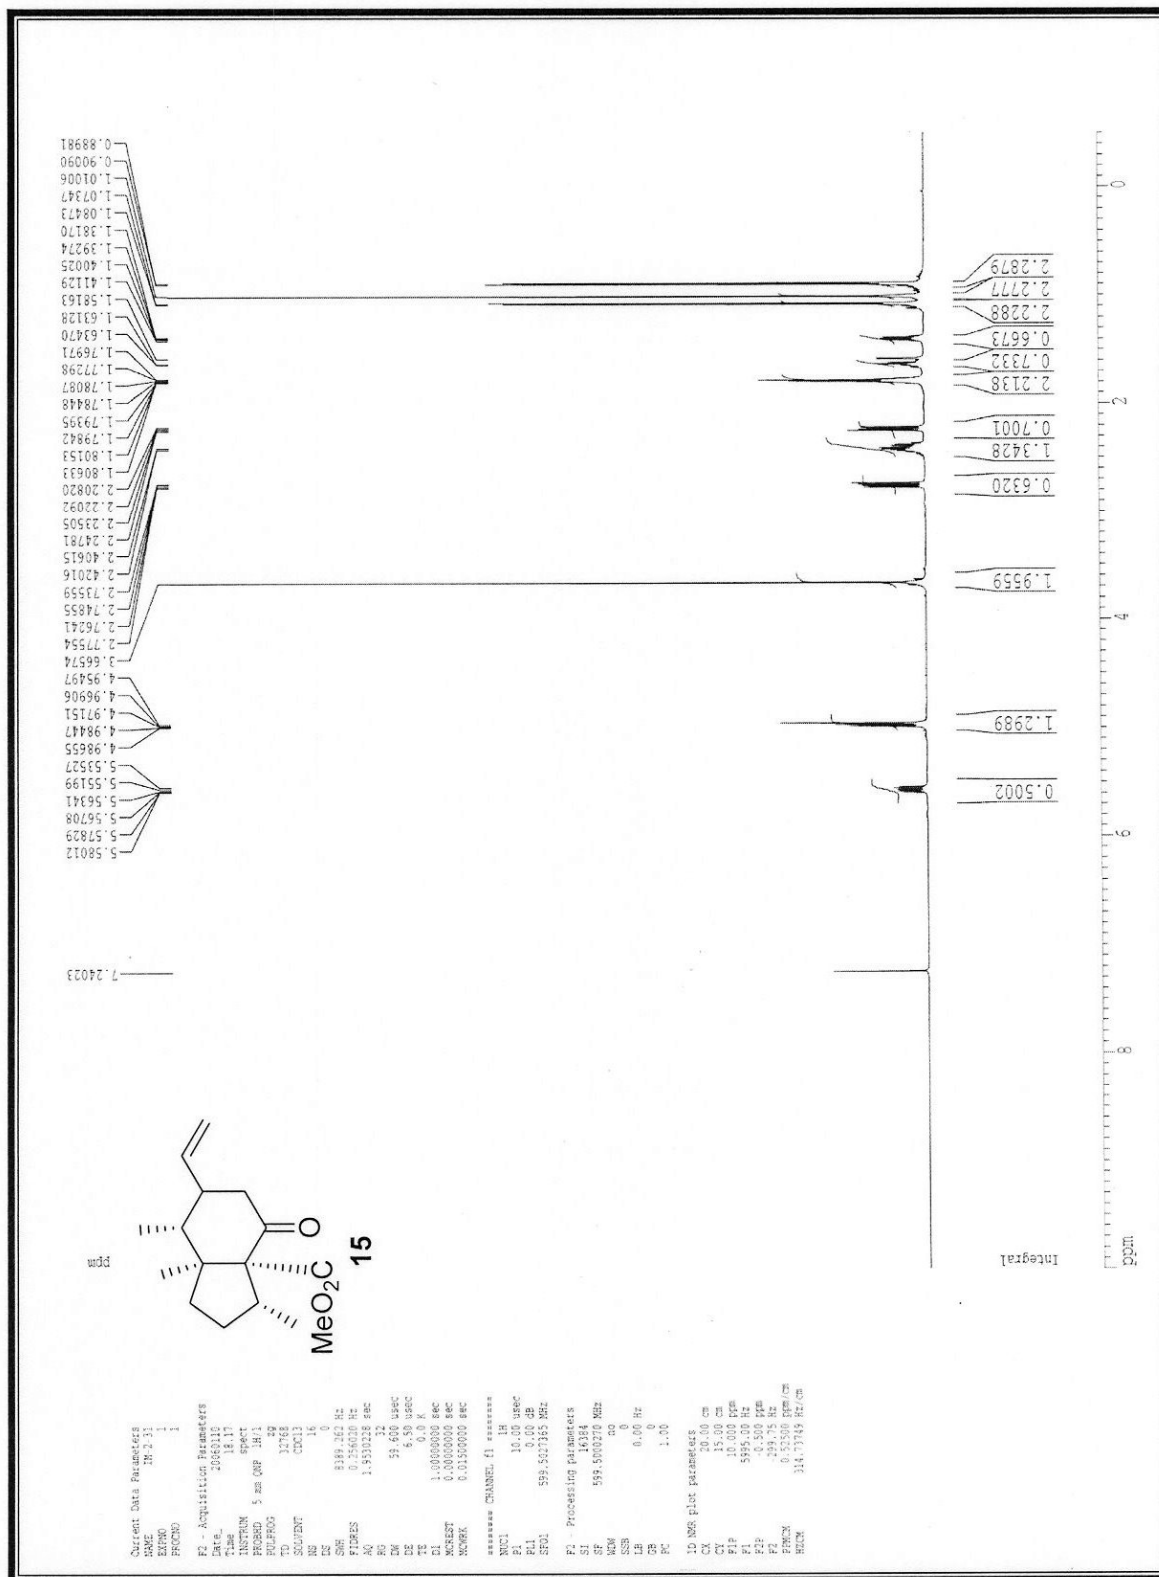

<sup>1</sup>H NMR of Compound 15

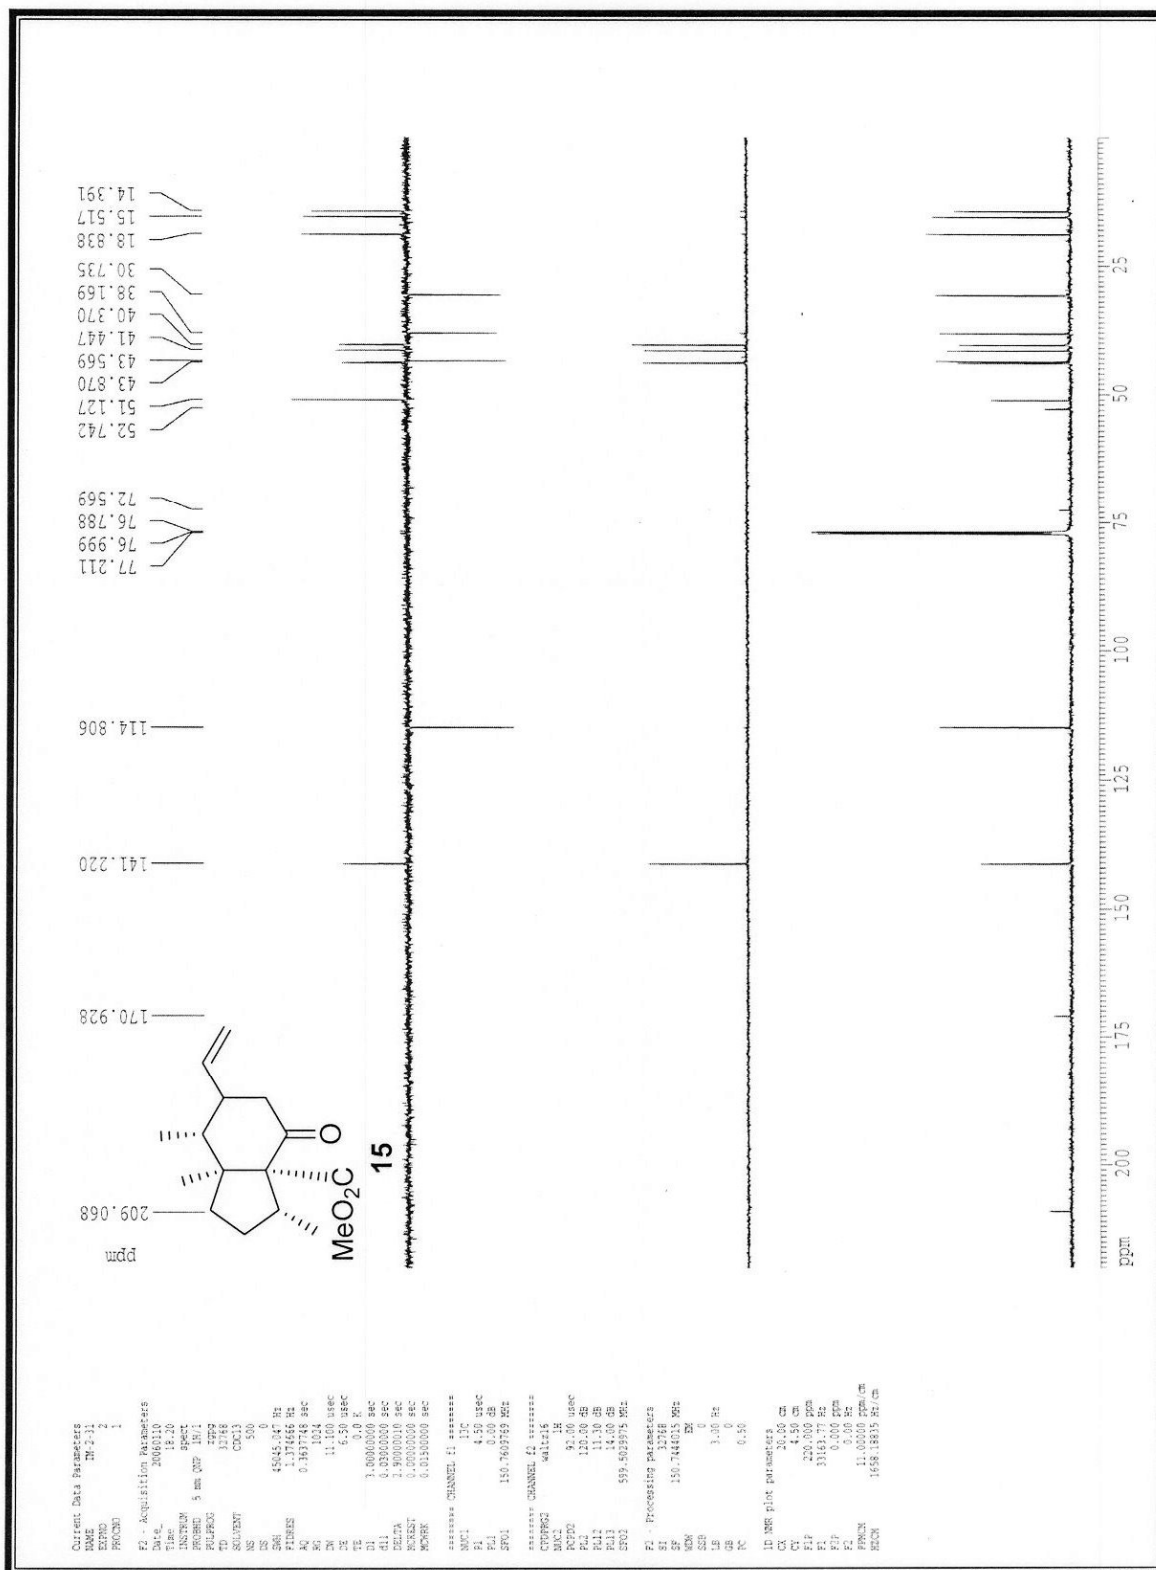

<sup>13</sup>C NMR of Compound 15

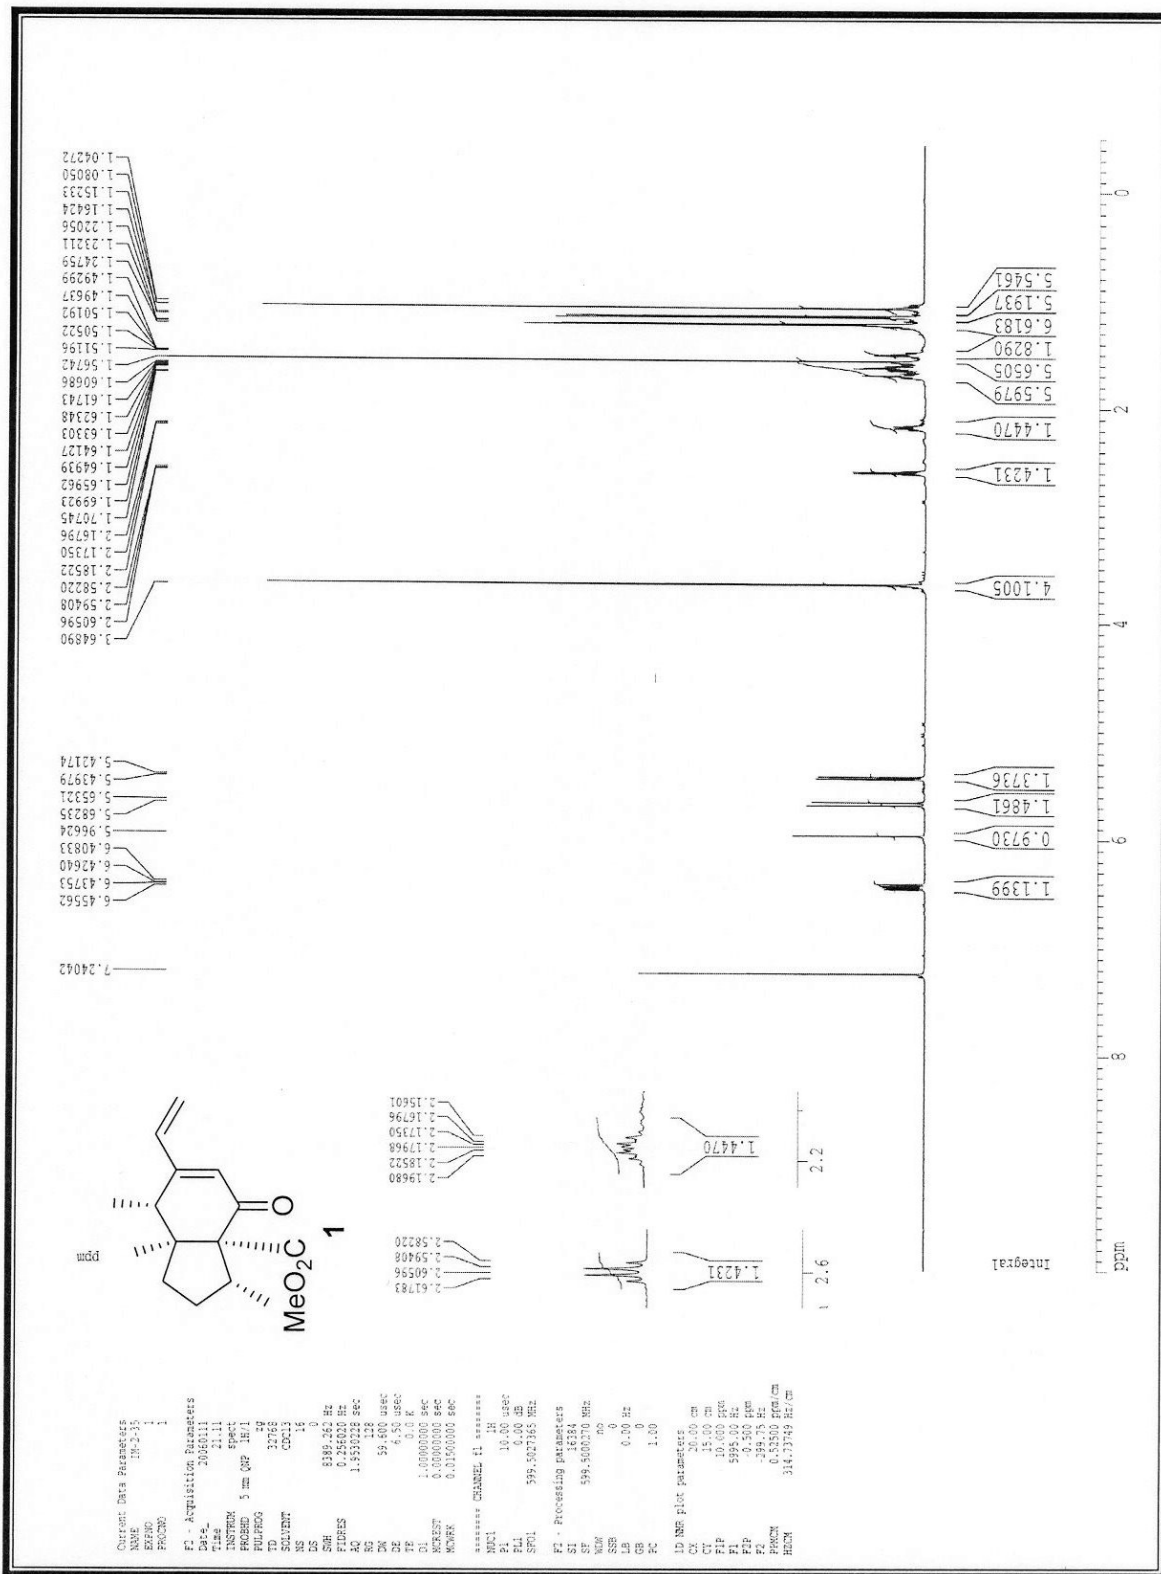

<sup>1</sup>H NMR of Compound 1

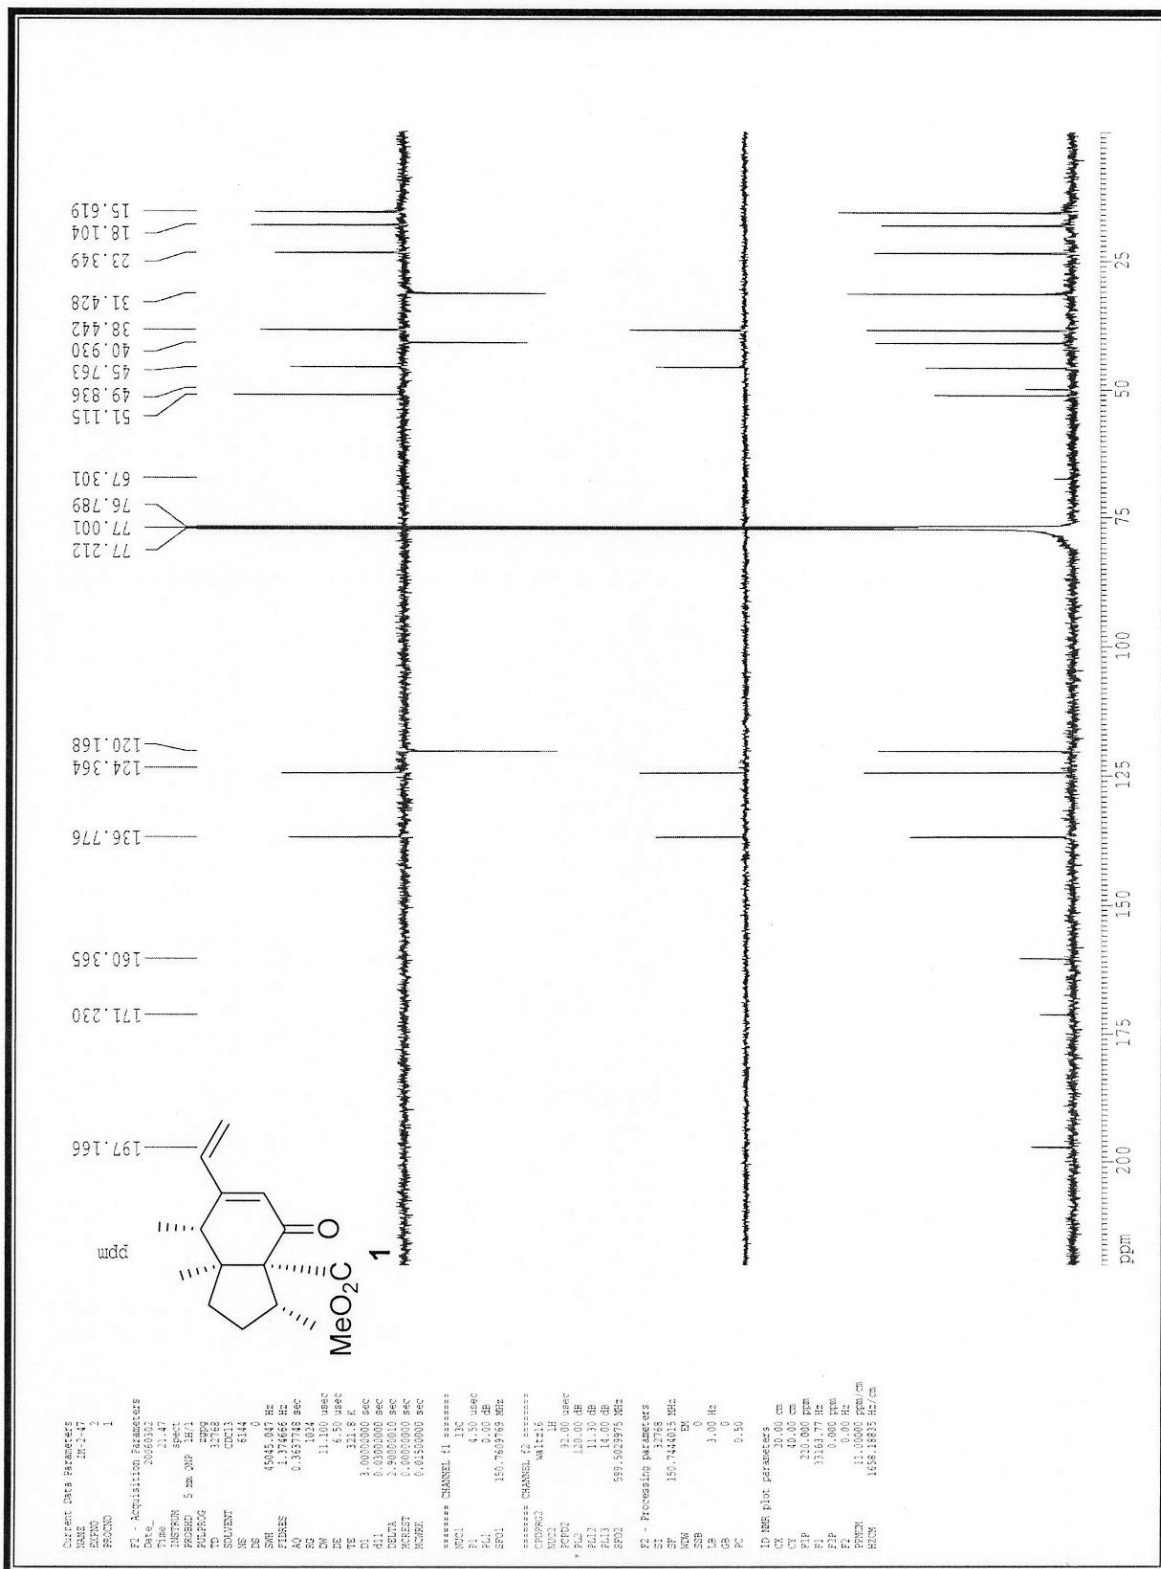

<sup>13</sup>C NMR of Compound 1

The X-ray crystallographic picture of **5a**, a 2,4-DNP derivative of the major component of **5**, which was deposited as CCDC 706353 in Cambridge Crystallographic Data Centre.

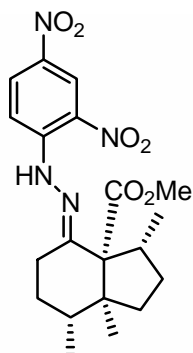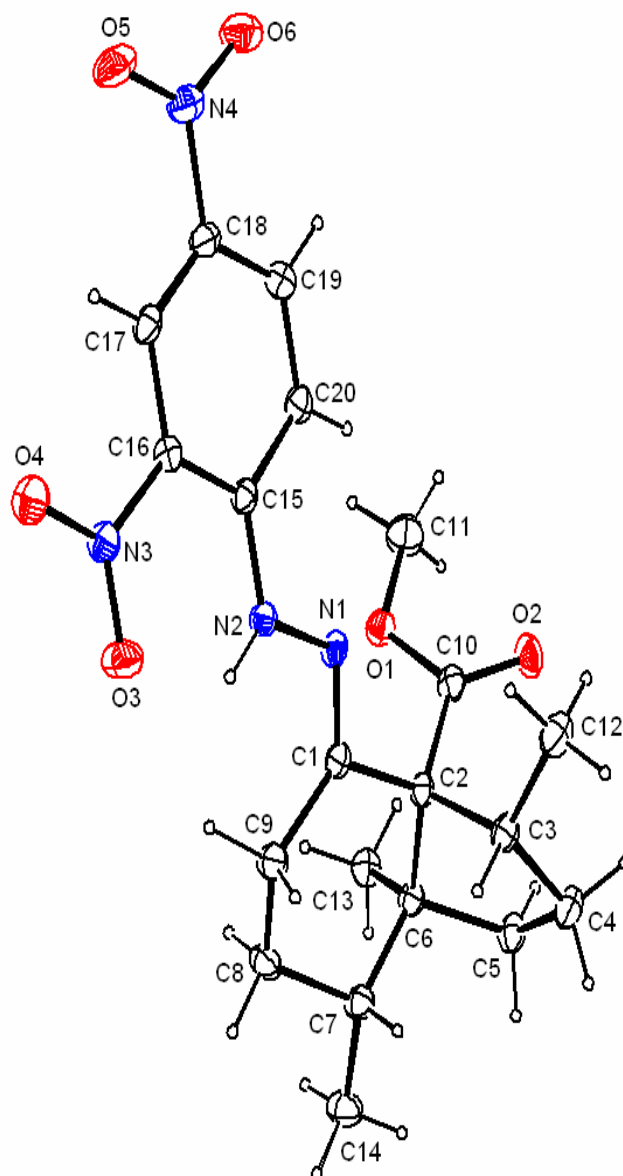

Supplement: b905910e.pdf [file b905910e.pdf]
